# Supplementary material for: Analysis of small RNA populations generated in peanut leaves after exogenous application of dsRNA and dsDNA targeting aflatoxin synthesis genes
Source: PubMed Central journal article supplement (PMC7427784; doi:10.1038/s41598-020-70618-6), 2020-08-14
Supplement: 41598_2020_70618_MOESM1_ESM.pdf [file 41598_2020_70618_MOESM1_ESM.pdf]

1 **Analysis of small RNA populations generated in peanut leaves**  
2 **after exogenous application of dsRNA and dsDNA targeting**  
3 **aflatoxin synthesis genes**

4

5

6 Imana L. Power<sup>1,2\*</sup>, Paola C. Faustinelli<sup>1</sup>, Valerie A. Orner<sup>1</sup>, Victor S. Sobolev<sup>1</sup>, and Renee S.  
7 Arias<sup>1</sup>

8 <sup>1</sup> United States Department of Agriculture, Agricultural Research Service, National Peanut  
9 Research Laboratory (NPRL), Dawson, Georgia, United States of America

10 <sup>2</sup>Current address: Center for Agricultural Research in Suriname (CELOS), Paramaribo, Suriname

11

12

13 \* Corresponding author

14 Email: imanapower@yahoo.com (IP)

15

Supplementary Table S1

| miRNA Family | Total        |            |            |              | Total        |            |            |              |
|--------------|--------------|------------|------------|--------------|--------------|------------|------------|--------------|
|              | Control 24 h | dsRNA 24 h | dsDNA 24 h | members 24 h | Control 48 h | dsRNA 48 h | dsDNA 48 h | members 48 h |
| miR156       | 17,265       | 12,852     | 9,723      | 21           | 12,556       | 13,124     | 9,619      | 22           |
| miR159       | 28,058       | 18,256     | 14,092     | 4            | 20,692       | 21,734     | 14,582     | 4            |
| miR160       | 148          | 185        | 147        | 3            | 128          | 158        | 131        | 1            |
| miR162       | 484          | 693        | 633        | 2            | 513          | 480        | 488        | 3            |
| miR164       | 38           | 27         | 21         | 3            | 38           | 58         | 22         | 2            |
| miR166       | 491,637      | 445,469    | 528,400    | 15           | 484,086      | 425,470    | 460,811    | 15           |
| miR167       | 10,916       | 7,316      | 7,462      | 10           | 8,179        | 6,947      | 6,736      | 10           |
| miR168       | 3,417        | 4,982      | 3,316      | 3            | 3,074        | 3,752      | 2,498      | 3            |
| miR169       | 65           | 115        | 129        | 5            | 65           | 100        | 131        | 4            |
| miR171       | 192          | 184        | 183        | 6            | 168          | 203        | 202        | 7            |
| miR172       | 389          | 491        | 382        | 4            | 418          | 465        | 434        | 4            |
| miR319       | 732          | 507        | 446        | 4            | 651          | 634        | 465        | 5            |
| miR390       | 77           | 130        | 112        | 2            | 83           | 106        | 91         | 2            |
| miR393       | 456          | 250        | 275        | 4            | 332          | 240        | 265        | 5            |
| miR394       | 858          | 1,070      | 727        | 3            | 689          | 1,048      | 774        | 4            |
| miR395       | 217          | 528        | 228        | 10           | 302          | 513        | 269        | 10           |
| miR396       | 64,204       | 97,325     | 88,918     | 8            | 80,836       | 92,803     | 86,070     | 8            |
| miR397       | 79           | 29         | 30         | 1            | 62           | 29         | 39         | 1            |
| miR398       | 50           | 91         | 116        | 2            | 326          | 96         | 265        | 2            |
| miR399       | 80           | 47         | 29         | 2            | 66           | 69         | 30         | 3            |
| miR401       | 0            | 0          | 0          | 0            | 3            | 13         | 2          | 1            |
| miR408       | 4,266        | 2,233      | 2,247      | 3            | 2,447        | 2,176      | 1,693      | 3            |
| miR472       | 22           | 12         | 6          | 1            | 20           | 18         | 10         | 1            |
| miR477       | 30           | 65         | 49         | 2            | 41           | 56         | 48         | 3            |
| miR479       | 4            | 18         | 9          | 1            | 6            | 25         | 18         | 1            |
| miR482       | 19,835       | 29,155     | 31,680     | 3            | 22,127       | 23,573     | 31,828     | 4            |
| miR821       | 15           | 10         | 5          | 1            | 19           | 10         | 10         | 1            |
| miR862       | 232          | 337        | 236        | 1            | 240          | 283        | 293        | 2            |
| miR894       | 91           | 83         | 68         | 1            | 136          | 94         | 74         | 1            |
| miR952       | 0            | 0          | 0          | 0            | 5            | 14         | 3          | 1            |
| miR1065      | 0            | 0          | 0          | 0            | 9            | 6          | 3          | 1            |
| miR1103      | 32           | 15         | 4          | 2            | 30           | 54         | 12         | 1            |
| miR1122      | 0            | 0          | 0          | 0            | 3            | 13         | 3          | 1            |
| miR1432      | 10           | 2          | 1          | 1            | 8            | 18         | 4          | 1            |
| miR1507      | 16,493       | 18,352     | 20,431     | 2            | 16,032       | 16,115     | 17,303     | 2            |
| miR1511      | 3,027        | 3,447      | 2,463      | 3            | 2,947        | 3,687      | 2,521      | 3            |
| miR1851      | 21           | 15         | 17         | 1            | 4            | 11         | 2          | 1            |
| miR2111      | 8,004        | 6,942      | 8,595      | 4            | 15           | 10         | 16         | 1            |
| miR2118      | 0            | 0          | 0          | 0            | 8,869        | 6,088      | 8,379      | 3            |
| miR2275      | 0            | 0          | 0          | 0            | 3            | 8          | 2          | 1            |
| miR2592      | 47           | 15         | 6          | 1            | 55           | 127        | 19         | 1            |
| miR2603      | 0            | 0          | 0          | 0            | 10           | 19         | 2          | 1            |
| miR2673      | 43           | 44         | 33         | 1            | 31           | 64         | 33         | 1            |
| miR2916      | 2,957        | 1,829      | 1,892      | 2            | 6,436        | 6,967      | 6,450      | 2            |
| miR2931      | 0            | 0          | 0          | 0            | 1            | 6          | 1          | 1            |
| miR3440      | 0            | 0          | 0          | 0            | 1            | 8          | 1          | 1            |
| miR3508      | 2,494        | 1,448      | 1,356      | 1            | 1,623        | 1,241      | 1,100      | 1            |
| miR3509      | 849          | 1,003      | 1,149      | 4            | 866          | 803        | 1,042      | 4            |
| miR3511      | 9            | 1          | 3          | 1            | 9            | 3          | 3          | 1            |
| miR3512      | 9            | 4          | 6          | 1            | 23           | 23         | 15         | 1            |
| miR3513      | 461          | 483        | 464        | 2            | 450          | 455        | 425        | 2            |

All data have been deposited in FigShare: doi: **10.6084/m9.figshare.11771628**. The mapping coordinates are available in the different "comp\_6492\_" files.

|         |       |       |       |   |       |        |       |   |
|---------|-------|-------|-------|---|-------|--------|-------|---|
| miR3514 | 3,303 | 4,196 | 4,214 | 1 | 3,273 | 2,881  | 3,374 | 1 |
| miR3515 | 25    | 26    | 47    | 2 | 60    | 24     | 74    | 2 |
| miR3516 | 27    | 13    | 15    | 1 | 25    | 10     | 11    | 1 |
| miR3518 | 181   | 224   | 174   | 2 | 166   | 293    | 175   | 2 |
| miR3520 | 31    | 24    | 29    | 3 | 21    | 14     | 23    | 2 |
| miR3627 | 16    | 20    | 11    | 1 | 35    | 37     | 13    | 1 |
| miR3701 | 12    | 5     | 3     | 1 | 6     | 14     | 5     | 1 |
| miR4236 | 27    | 13    | 4     | 1 | 28    | 73     | 9     | 1 |
| miR4243 | 7     | 4     | 4     | 1 | 11    | 22     | 2     | 1 |
| miR4382 | 8     | 2     | 0     | 1 | 1     | 10     | 3     | 1 |
| miR4995 | 0     | 0     | 0     | 0 | 4     | 17     | 4     | 1 |
| miR5037 | 9     | 13    | 5     | 1 | 8     | 19     | 6     | 1 |
| miR5054 | 22    | 6     | 3     | 1 | 21    | 21     | 6     | 1 |
| miR5059 | 0     | 0     | 0     | 0 | 11    | 21     | 7     | 1 |
| miR5083 | 19    | 3     | 2     | 1 | 12    | 9      | 3     | 1 |
| miR5141 | 157   | 106   | 85    | 2 | 166   | 108    | 101   | 2 |
| miR5167 | 19    | 11    | 2     | 1 | 16    | 21     | 5     | 1 |
| miR5211 | 8     | 10    | 15    | 1 | 44    | 35     | 46    | 1 |
| miR5223 | 8     | 5     | 3     | 1 | 9     | 10     | 3     | 1 |
| miR5266 | 0     | 0     | 0     | 0 | 2     | 19     | 2     | 1 |
| miR5291 | 13    | 1     | 2     | 1 | 16    | 17     | 7     | 1 |
| miR5294 | 11    | 3     | 4     | 1 | 10    | 12     | 3     | 1 |
| miR5298 | 0     | 0     | 0     | 0 | 4     | 11     | 1     | 1 |
| miR5303 | 0     | 0     | 0     | 0 | 4     | 16     | 4     | 1 |
| miR5368 | 7,742 | 7,740 | 6,830 | 2 | 8,902 | 13,475 | 9,403 | 2 |
| miR5381 | 399   | 270   | 74    | 1 | 347   | 921    | 121   | 1 |
| miR5493 | 8     | 3     | 0     | 1 | 32    | 21     | 8     | 1 |
| miR5652 | 200   | 47    | 22    | 1 | 199   | 338    | 82    | 1 |
| miR5724 | 218   | 46    | 24    | 1 | 136   | 284    | 49    | 1 |
| miR6025 | 88    | 41    | 48    | 1 | 130   | 26     | 39    | 1 |
| miR6300 | 15    | 6     | 2     | 1 | 22    | 35     | 7     | 2 |
| miR6475 | 0     | 0     | 0     | 0 | 6     | 8      | 2     | 1 |
| miR6478 | 17    | 7     | 2     | 1 | 26    | 36     | 6     | 1 |
| miR7485 | 0     | 0     | 0     | 0 | 2     | 19     | 3     | 1 |
| miR7504 | 0     | 0     | 0     | 0 | 4     | 7      | 0     | 1 |
| miR7528 | 0     | 0     | 0     | 0 | 11    | 7      | 1     | 1 |
| miR7530 | 0     | 0     | 0     | 0 | 3     | 12     | 1     | 1 |
| miR7693 | 0     | 0     | 0     | 0 | 2     | 7      | 0     | 1 |
| miR8154 | 21    | 10    | 4     | 1 | 16    | 116    | 6     | 1 |
| miR8155 | 224   | 55    | 32    | 1 | 8     | 10     | 5     | 1 |
| miR8175 | 0     | 0     | 0     | 0 | 171   | 167    | 42    | 1 |
| miR8572 | 0     | 0     | 0     | 0 | 5     | 12     | 1     | 1 |
| miR8681 | 0     | 0     | 0     | 0 | 2     | 9      | 2     | 1 |
| miR9410 | 10    | 4     | 2     | 1 | 3     | 17     | 3     | 1 |
| miR9475 | 0     | 0     | 0     | 0 | 7     | 15     | 2     | 1 |
| miR9674 | 0     | 0     | 0     | 0 | 4     | 20     | 3     | 1 |

Supplementary Table S2

| Reference miRNA         | miRNA Sequence          | Length | Abundance | Abundance | Abundance | Log2<br>(dsRNA/<br>Control) | Log2<br>(dsDNA/<br>Control) | P        |
|-------------------------|-------------------------|--------|-----------|-----------|-----------|-----------------------------|-----------------------------|----------|
|                         |                         |        | Control   | dsRNA     | dsDNA     |                             |                             |          |
| sno-MIR1103-p3_1ss6CT   | CCUCCUGGGGAAGUCC        | 15     | 25        | 11        | 4         | -1.16                       | -2.80                       | 8.19E-02 |
| sbi-MIR5381-p5_1ss11AG  | CUCGGCCAGGAUC           | 15     | 399       | 270       | 74        | -0.56                       | -2.43                       | 6.38E-02 |
| sbi-MIR171b-p5_1ss16GT  | CGCGACGGGUUUUUGU        | 16     | 10        | 2         | 2         | -2.11                       | -2.22                       | 3.11E-02 |
| ptc-miR166p_L+2R-2      | UCUCGACCAGGCCAUUCC      | 21     | 10        | 4         | 2         | -1.31                       | -2.24                       | 3.48E-02 |
| osa-MIR5083-p3_1ss15GT  | AUCCUUCUGAGCCUU         | 15     | 19        | 3         | 2         | -2.54                       | -3.47                       | 4.58E-02 |
| mtr-MIR2592bi-p5_1ss8TC | AUUCACCUCUGCCUUGU       | 17     | 47        | 15        | 6         | -1.61                       | -2.92                       | 4.60E-02 |
| gma-miR6300_L-3         | GUUGUAGUUAUAGUGG        | 15     | 15        | 6         | 2         | -1.20                       | -3.07                       | 7.66E-02 |
| gma-MIR4382-p3_1ss9AC   | GGGGAAGUCGGAUAU         | 15     | 8         | 2         | 0         | -2.10                       | -12.90                      | 1.34E-03 |
| bra-MIR5724-p3_1ss1TA   | AAUCAUGUGGGUCUCU        | 15     | 218       | 46        | 24        | -2.23                       | -3.19                       | 9.35E-03 |
| ath-miR8175_L-2         | UCCCCGGCAACGGCGCCA      | 18     | 224       | 55        | 32        | -2.03                       | -2.80                       | 5.17E-02 |
| ath-MIR5652-p5_1ss7TC   | ACAAUACGGGCUCA          | 15     | 200       | 47        | 22        | -2.10                       | -3.15                       | 1.35E-02 |
| aly-MIR4236-p5_1ss5CG   | GACGGAAGGGCACCA         | 15     | 27        | 13        | 4         | -1.04                       | -2.59                       | 9.42E-02 |
| ahy-miR160-5p           | UGCCUGGCUCCUGAAUGCCA    | 21     | 1         | 10        | 5         | 3.15                        | 2.15                        | 2.81E-02 |
| ahy-miR156b-3p          | GCUCUCUAGCUCUCUGAUC     | 21     | 5         | 17        | 19        | 1.91                        | 2.05                        | 4.32E-02 |
| ahy-MIR398-p5_1ss9CA    | GGAGUAAACUGAGAACAACAAAG | 23     | 12        | 44        | 50        | 1.92                        | 2.11                        | 4.03E-02 |

All data have been deposited in FigShare: doi: 10.6084/m9.figshare.11771628. The mapping coordinates are available in the different "comp\_6492\_" files.

| Reference miRNA               | miRNA Sequence        | Length | Abundance | Abundance | Abundance | Log2<br>(dsRNA/<br>Control) | Log2<br>(dsDNA/<br>Control) | P        |
|-------------------------------|-----------------------|--------|-----------|-----------|-----------|-----------------------------|-----------------------------|----------|
|                               |                       |        | Control   | dsRNA     | dsDNA     |                             |                             |          |
| zma-miR395a-3p_L-5R-1         | GUGUUUGGGGAACU        | 15     | 3         | 10        | 0         | 1.77                        | -11.50                      | 9.53E-05 |
| ptc-miR6478_R_5_1ss10GA       | CCGACCUUAACUCAGU      | 16     | 26        | 36        | 6         | 0.50                        | -2.12                       | 5.54E-02 |
| osa-miR7693-3p_L-6R-1_1ss19GA | CAUCGAUGAAGAACG       | 15     | 2         | 7         | 0         | 2.05                        | -10.67                      | 1.92E-03 |
| mtr-miR5266_L-4R-1_1ss10TA    | GGGACAGUCUGGGGC       | 15     | 2         | 19        | 2         | 3.57                        | 0.61                        | 8.39E-03 |
| mtr-MIR5298b-p3_1ss15GT       | AAGAUAAAAGGACU        | 15     | 4         | 11        | 1         | 1.47                        | -2.00                       | 1.17E-02 |
| lja-MIR7530-p5_1ss9TC         | CCUCUCCCCUUCU         | 16     | 3         | 12        | 1         | 2.10                        | -1.57                       | 7.91E-03 |
| gra-MIR7504k-p3_1ss9AC        | UGAAAAUCCGGAGGA       | 15     | 4         | 7         | 0         | 0.80                        | -12.03                      | 6.15E-03 |
| gma-miR399a_L-1R-2            | GCCAAAGGAGAGUUGCCC    | 18     | 6         | 8         | 1         | 0.32                        | -3.11                       | 2.24E-02 |
| ghr-MIR7485-p5_1ss14TC        | CCUCUUCUCUUCU         | 15     | 2         | 19        | 3         | 3.41                        | 0.97                        | 2.49E-02 |
| cpa-MIR8154-p3_1ss8CT         | CCUCUCUCUCCUCC        | 15     | 16        | 116       | 6         | 2.84                        | -1.45                       | 9.27E-02 |
| bol-MIR9410-p3_1ss5TG         | CUUJGACAGACACUU       | 15     | 3         | 17        | 3         | 2.66                        | 0.08                        | 4.90E-03 |
| atr-MIR8572-p3_1ss13TC        | CCCCAGUGGAGUCGC       | 15     | 5         | 12        | 1         | 1.35                        | -2.31                       | 3.23E-02 |
| aly-MIR4243-p3_1ss12AC        | UGAGAGCAUGCCUUCGUC    | 16     | 11        | 22        | 2         | 1.03                        | -2.59                       | 5.09E-02 |
| ahy-miR156b-3p_R+1_2ss9AT10GT | GCUCUCUUAUCUCUGUCAUCU | 22     | 11        | 3         | 3         | -1.75                       | -2.04                       | 4.65E-02 |

Supplementary Table S3

| siRNA         | Strand | Gene          | Start | Sequence                          | Length | Control |      | dsRNA |      | dsDNA |      |
|---------------|--------|---------------|-------|-----------------------------------|--------|---------|------|-------|------|-------|------|
|               |        |               |       |                                   |        | 24 h    | 48 h | 24 h  | 48 h | 24 h  | 48 h |
| siRNA_1487746 | -      | <i>afl</i> R  | 60    | GGUCUUGCCUGUCAAUACAUGGUCGUAU      | 28     | 0       | 0    | 0     | 1    | 0     | 0    |
| siRNA_962224  | -      | <i>afl</i> R  | 60    | GGUCUUGCCUGUCAAUACAUGGUCGUA       | 27     | 0       | 0    | 0     | 2    | 0     | 0    |
| siRNA_1277017 | -      | <i>afl</i> R  | 65    | UGCCUGUCAAUACAUGGUCGUAU           | 23     | 0       | 0    | 0     | 2    | 0     | 0    |
| siRNA_265665  | -      | <i>afl</i> R  | 65    | UGCCUGUCAAUACAUGGUCGU             | 21     | 0       | 0    | 0     | 0    | 1     | 6    |
| siRNA_186906  | -      | <i>afl</i> R  | 65    | UGCCUGUCAAUACAUGGUCGUA            | 22     | 0       | 0    | 1     | 0    | 4     | 6    |
| siRNA_1549296 | -      | <i>afl</i> R  | 66    | GCCUGUCAAUACAUGGUCGUA             | 21     | 0       | 0    | 0     | 0    | 0     | 1    |
| siRNA_2913232 | +      | <i>afl</i> R  | 67    | CCUGUCAAUACAUGGUCGUAU             | 21     | 0       | 0    | 0     | 0    | 0     | 1    |
| siRNA_3355126 | -      | <i>afl</i> R  | 69    | UGUCAAUACAUGGUCGU                 | 17     | 0       | 0    | 0     | 1    | 0     | 0    |
| siRNA_852019  | -      | <i>afl</i> R  | 69    | UGUCAAUACAUGGUCGUAU               | 19     | 0       | 0    | 1     | 1    | 0     | 0    |
| siRNA_543477  | -      | <i>afl</i> R  | 69    | UGUCAAUACAUGGUCGUA                | 18     | 0       | 0    | 0     | 2    | 0     | 0    |
| siRNA_2850551 | -      | <i>afl</i> R  | 73    | AAUACAUGGUCGUUUUGUGAC             | 22     | 0       | 0    | 0     | 0    | 1     | 0    |
| siRNA_606850  | +      | <i>afl</i> R  | 73    | AAUACAUGGUCGUUUUGUGAC             | 22     | 0       | 0    | 0     | 0    | 0     | 3    |
| siRNA_322442  | +      | <i>afl</i> R  | 74    | AUACAUGGUCGUUUUGUGAC              | 21     | 0       | 0    | 0     | 0    | 0     | 6    |
| siRNA_4005125 | +      | <i>afl</i> ep | 81    | GUCGUUUUGUGACCAUGUUUC             | 22     | 0       | 0    | 0     | 0    | 0     | 1    |
| siRNA_2068616 | +      | <i>afl</i> ep | 82    | UCGUUUUGUGACCAUGUUUCU             | 22     | 0       | 0    | 0     | 0    | 0     | 1    |
| siRNA_797920  | +      | <i>afl</i> ep | 82    | UCGUUUUGUGACCAUGUUUC              | 21     | 0       | 0    | 0     | 0    | 1     | 2    |
| siRNA_1666418 | +      | <i>afl</i> ep | 83    | CGUUUUUGUGACCAUGUUUCUGG           | 23     | 0       | 0    | 0     | 0    | 0     | 1    |
| siRNA_409172  | +      | <i>afl</i> ep | 83    | CGUUUUUGUGACCAUGUUUCU             | 21     | 0       | 0    | 0     | 0    | 1     | 4    |
| siRNA_965707  | +      | <i>afl</i> ep | 85    | UAUUUGUGACCAUGUUUCUGG             | 21     | 0       | 0    | 0     | 0    | 0     | 2    |
| siRNA_2776872 | -      | <i>afl</i> ep | 86    | AUUUGUGACCAUGUUUCUGG              | 20     | 0       | 0    | 0     | 1    | 0     | 0    |
| siRNA_1466180 | -      | <i>afl</i> ep | 91    | UGACCAUGUUUCUGGUGGCAUUGGACCGUCUUG | 33     | 0       | 0    | 0     | 1    | 0     | 0    |
| siRNA_2919449 | -      | <i>afl</i> ep | 92    | GACCAUGUUUCUGGUGGCAUUGGACCGUC     | 29     | 0       | 0    | 0     | 1    | 0     | 0    |
| siRNA_1345076 | -      | <i>afl</i> ep | 93    | ACCAUGUUUCUGGUGGCAUUGG            | 22     | 0       | 0    | 0     | 0    | 0     | 1    |
| siRNA_1628558 | -      | <i>afl</i> ep | 94    | CCAUGUUUCUGGUGGCAUUGGA            | 22     | 0       | 0    | 0     | 0    | 0     | 1    |
| siRNA_932133  | -      | <i>afl</i> ep | 94    | CCAUGUUUCUGGUGGCAUUGG             | 21     | 0       | 0    | 0     | 0    | 0     | 2    |
| siRNA_1665611 | -      | <i>afl</i> ep | 95    | CAUGUUUCUGGUGGCAU                 | 17     | 0       | 0    | 0     | 2    | 0     | 0    |
| siRNA_2535926 | +      | <i>afl</i> ep | 95    | CAUGUUUCUGGUGGCAUUGGA             | 21     | 0       | 0    | 0     | 0    | 0     | 1    |
| siRNA_1716938 | +      | <i>afl</i> ep | 95    | CAUGUUUCUGGUGGCAUUGGACCG          | 24     | 0       | 0    | 0     | 0    | 0     | 1    |
| siRNA_1132164 | +      | <i>afl</i> ep | 95    | CAUGUUUCUGGUGGCAUUGGACC           | 23     | 0       | 0    | 0     | 0    | 1     | 1    |
| siRNA_2647757 | +      | <i>afl</i> ep | 96    | AUGUUUCUGGUGGCAUUGGAC             | 21     | 0       | 0    | 0     | 0    | 0     | 1    |
| siRNA_571833  | -      | <i>afl</i> ep | 96    | AUGUUUCUGGUGGCAUUGGAC             | 21     | 0       | 0    | 0     | 0    | 2     | 2    |
| siRNA_333493  | +      | <i>afl</i> ep | 96    | AUGUUUCUGGUGGCAUUGGACC            | 22     | 0       | 0    | 0     | 0    | 3     | 3    |
| siRNA_4122314 | +      | <i>afl</i> ep | 97    | UGUUUCUGGUGGCAUUGGACCGU           | 23     | 0       | 0    | 0     | 0    | 0     | 1    |
| siRNA_953716  | +      | <i>afl</i> ep | 97    | UGUUUCUGGUGGCAUUGGACCGUC          | 24     | 0       | 0    | 0     | 0    | 1     | 1    |
| siRNA_151424  | +      | <i>afl</i> ep | 97    | UGUUUCUGGUGGCAUUGGACC             | 21     | 0       | 0    | 0     | 0    | 4     | 10   |
| siRNA_1069167 | -      | <i>afl</i> ep | 98    | GUUUCUGGUGGCAUUGGACCG             | 21     | 0       | 0    | 0     | 1    | 0     | 0    |
| siRNA_4294981 | +      | <i>afl</i> ep | 98    | GUUUCUGGUGGCAUUGGACCG             | 21     | 0       | 0    | 0     | 0    | 0     | 1    |
| siRNA_1166783 | -      | <i>afl</i> ep | 98    | GUUUCUGGUGGCAUUGGACCGUCU          | 24     | 0       | 0    | 0     | 1    | 0     | 1    |

|               |   |               |     |                                 |    |   |   |   |   |   |    |
|---------------|---|---------------|-----|---------------------------------|----|---|---|---|---|---|----|
| siRNA_1044318 | + | <i>afl</i> ep | 99  | UUUCUGGUGGCAUUGGACCGU           | 21 | 0 | 0 | 0 | 0 | 1 | 0  |
| siRNA_2705417 | + | <i>afl</i> ep | 99  | UUUCUGGUGGCAUUGGACCGUCUU        | 24 | 0 | 0 | 0 | 0 | 0 | 1  |
| siRNA_1877729 | + | <i>afl</i> ep | 99  | UUUCUGGUGGCAUUGGACCGUCU         | 23 | 0 | 0 | 0 | 0 | 0 | 1  |
| siRNA_304219  | + | <i>afl</i> ep | 99  | UUUCUGGUGGCAUUGGACCGUC          | 22 | 0 | 0 | 0 | 0 | 2 | 5  |
| siRNA_3387393 | + | <i>afl</i> ep | 100 | UUUCUGGUGGCAUUGGACCGUCU         | 22 | 0 | 0 | 0 | 0 | 0 | 1  |
| siRNA_2803742 | + | <i>afl</i> ep | 100 | UUUCUGGUGGCAUUGGACC             | 18 | 0 | 0 | 0 | 0 | 0 | 1  |
| siRNA_3049623 | - | <i>afl</i> ep | 101 | UCUGGUGGCAUUGGACCGUC            | 20 | 0 | 0 | 0 | 1 | 0 | 0  |
| siRNA_2891403 | - | <i>afl</i> ep | 101 | UCUGGUGGCAUUGGACCGUCUUG         | 23 | 0 | 0 | 0 | 1 | 0 | 0  |
| siRNA_2273528 | - | <i>afl</i> ep | 101 | UCUGGUGGCAUUGGACCGUCUU          | 22 | 0 | 0 | 0 | 0 | 0 | 1  |
| siRNA_943160  | + | <i>afl</i> ep | 101 | UCUGGUGGCAUUGGACCGUCU           | 21 | 0 | 0 | 0 | 0 | 0 | 2  |
| siRNA_2822778 | - | <i>afl</i> ep | 103 | UGGUGGCAUUGGACCGUCUUGU          | 22 | 0 | 0 | 0 | 1 | 0 | 1  |
| siRNA_1010387 | - | <i>afl</i> ep | 103 | UGGUGGCAUUGGACCGUCUUG           | 21 | 0 | 0 | 1 | 1 | 0 | 1  |
| siRNA_3164902 | - | <i>afl</i> ep | 104 | GGUGGCAUUGGACCGUCU              | 18 | 0 | 0 | 1 | 0 | 0 | 0  |
| siRNA_1562453 | - | <i>afl</i> ep | 104 | GGUGGCAUUGGACCGUCUUGUC          | 22 | 0 | 0 | 1 | 1 | 0 | 0  |
| siRNA_1100669 | - | <i>afl</i> ep | 104 | GGUGGCAUUGGACCGUCUUGUCA         | 23 | 0 | 0 | 0 | 0 | 0 | 1  |
| siRNA_823228  | - | <i>afl</i> ep | 104 | GGUGGCAUUGGACCGUCUUGU           | 21 | 0 | 0 | 0 | 0 | 1 | 1  |
| siRNA_1668392 | - | <i>afl</i> ep | 104 | GGUGGCAUUGGACCGUCUUGUCAU        | 24 | 0 | 0 | 0 | 0 | 0 | 2  |
| siRNA_1983992 | + | <i>afl</i> ep | 105 | GUGGCAUUGGACCGUCUUGUC           | 21 | 0 | 0 | 0 | 0 | 0 | 1  |
| siRNA_1967267 | - | <i>afl</i> ep | 106 | UGGCAUUGGACCGUCUUGUCA           | 21 | 0 | 0 | 0 | 0 | 1 | 0  |
| siRNA_3716218 | + | <i>afl</i> ep | 106 | UGGCAUUGGACCGUCUUGUCAUCU        | 24 | 0 | 0 | 0 | 0 | 0 | 1  |
| siRNA_183999  | + | <i>afl</i> ep | 106 | UGGCAUUGGACCGUCUUGUCAUC         | 23 | 0 | 0 | 0 | 0 | 4 | 7  |
| siRNA_1645149 | - | <i>afl</i> ep | 107 | GGCAUUGGACCGUCUUGUCAUCUACAGCCAU | 33 | 0 | 0 | 1 | 0 | 0 | 0  |
| siRNA_4238434 | + | <i>afl</i> ep | 107 | GGCAUUGGACCGUCUUGUCAUCUCU       | 25 | 0 | 0 | 0 | 0 | 1 | 0  |
| siRNA_1237865 | - | <i>afl</i> ep | 107 | GGCAUUGGACCGUCUUGUCA            | 20 | 0 | 0 | 0 | 0 | 1 | 0  |
| siRNA_2361749 | + | <i>afl</i> ep | 107 | GGCAUUGGACCGUCUUGUCAUCUC        | 24 | 0 | 0 | 0 | 0 | 0 | 1  |
| siRNA_922458  | + | <i>afl</i> ep | 107 | GGCAUUGGACCGUCUUGUCAUC          | 22 | 0 | 0 | 0 | 0 | 0 | 2  |
| siRNA_460499  | - | <i>afl</i> ep | 107 | GGCAUUGGACCGUCUUGUCAUCUC        | 24 | 0 | 0 | 0 | 0 | 1 | 3  |
| siRNA_2548946 | + | <i>afl</i> ep | 108 | GCAUUGGACCGUCUUGUC              | 18 | 0 | 0 | 0 | 1 | 0 | 0  |
| siRNA_3601008 | - | <i>afl</i> ep | 108 | GCAUUGGACCGUCUUGUCAUC           | 21 | 0 | 0 | 0 | 0 | 0 | 1  |
| siRNA_563205  | - | <i>afl</i> ep | 108 | GCAUUGGACCGUCUUGUCAUCUCU        | 24 | 0 | 0 | 1 | 0 | 2 | 1  |
| siRNA_1712847 | + | <i>afl</i> ep | 108 | GCAUUGGACCGUCUUGUCAUCUCU        | 24 | 0 | 0 | 0 | 0 | 0 | 1  |
| siRNA_101788  | + | <i>afl</i> ep | 108 | GCAUUGGACCGUCUUGUCAUC           | 21 | 0 | 0 | 0 | 0 | 6 | 13 |
| siRNA_1292307 | + | <i>afl</i> ep | 109 | CAUUGGACCGUCUUGUCAUC            | 20 | 0 | 0 | 0 | 0 | 1 | 1  |
| siRNA_1711633 | + | <i>afl</i> ep | 109 | CAUUGGACCGUCUUGUCAUCU           | 21 | 0 | 0 | 0 | 0 | 0 | 2  |
| siRNA_681181  | + | <i>afl</i> ep | 109 | CAUUGGACCGUCUUGUCAUCUCU         | 23 | 0 | 0 | 0 | 0 | 0 | 3  |
| siRNA_472111  | + | <i>afl</i> ep | 109 | CAUUGGACCGUCUUGUCAUCUC          | 22 | 0 | 0 | 0 | 0 | 1 | 3  |
| siRNA_1539866 | - | <i>afl</i> ep | 110 | AUUGGACCGUCUUGUCAUCUCUA         | 23 | 0 | 0 | 0 | 1 | 0 | 0  |
| siRNA_1620357 | - | <i>afl</i> ep | 110 | AUUGGACCGUCUUGUCAUCUCUAC        | 24 | 0 | 0 | 0 | 0 | 0 | 1  |
| siRNA_1708667 | + | <i>afl</i> ep | 110 | AUUGGACCGUCUUGUCAUCUCU          | 22 | 0 | 0 | 0 | 0 | 0 | 1  |
| siRNA_1407409 | + | <i>afl</i> ep | 110 | AUUGGACCGUCUUGUCAUCUCUAC        | 24 | 0 | 0 | 0 | 0 | 0 | 1  |
| siRNA_695892  | - | <i>afl</i> ep | 110 | AUUGGACCGUCUUGUCAUCUC           | 21 | 0 | 0 | 0 | 1 | 0 | 1  |

|               |   |        |     |                              |    |   |   |   |   |    |    |
|---------------|---|--------|-----|------------------------------|----|---|---|---|---|----|----|
| siRNA_1131100 | + | afl ep | 110 | AUUGGACCGUCUUGUCAUCUC        | 21 | 0 | 0 | 0 | 0 | 0  | 2  |
| siRNA_378644  | - | afl ep | 110 | AUUGGACCGUCUUGUCAUCUCU       | 22 | 0 | 0 | 0 | 0 | 0  | 3  |
| siRNA_364675  | + | afl ep | 111 | UUGGACCGUCUUGUCAUCUCU        | 21 | 0 | 0 | 0 | 0 | 0  | 4  |
| siRNA_2076582 | + | afl ep | 112 | UGGACCGUCUUGUCAUCUCUAC       | 22 | 0 | 0 | 0 | 0 | 0  | 1  |
| siRNA_2925457 | - | afl ep | 113 | GGACCGUCUUGUCAUCUCU          | 19 | 0 | 0 | 0 | 1 | 0  | 0  |
| siRNA_3966005 | - | afl ep | 113 | GGACCGUCUUGUCAUCUCUACAGCC    | 25 | 0 | 0 | 0 | 1 | 0  | 0  |
| siRNA_1143158 | - | afl ep | 113 | GGACCGUCUUGUCAUCUCUACAGCCA   | 26 | 0 | 0 | 1 | 1 | 0  | 0  |
| siRNA_259636  | - | afl ep | 113 | GGACCGUCUUGUCAUCUC           | 18 | 0 | 0 | 2 | 5 | 0  | 0  |
| siRNA_1775651 | - | afl ep | 113 | GGACCGUCUUGUCAUCUCUA         | 20 | 0 | 0 | 0 | 0 | 1  | 0  |
| siRNA_1086357 | - | afl ep | 113 | GGACCGUCUUGUCAUCUCUAC        | 21 | 0 | 0 | 0 | 1 | 0  | 1  |
| siRNA_3078789 | + | afl ep | 113 | GGACCGUCUUGUCAUCUCUACAGC     | 24 | 0 | 0 | 0 | 0 | 0  | 1  |
| siRNA_503887  | - | afl ep | 113 | GGACCGUCUUGUCAUCUCUACA       | 22 | 0 | 0 | 0 | 1 | 0  | 3  |
| siRNA_4291716 | - | afl ep | 114 | GACCGUCUUGUCAUCUCUAC         | 20 | 0 | 0 | 0 | 1 | 0  | 0  |
| siRNA_2966606 | - | afl ep | 114 | GACCGUCUUGUCAUCU             | 16 | 0 | 0 | 0 | 1 | 0  | 0  |
| siRNA_2725207 | - | afl ep | 114 | GACCGUCUUGUCAUCUCUACAGCCAUUC | 28 | 0 | 0 | 0 | 0 | 1  | 0  |
| siRNA_2112080 | - | afl ep | 114 | GACCGUCUUGUCAUCUCUACAGCCA    | 25 | 0 | 0 | 0 | 0 | 0  | 1  |
| siRNA_468696  | - | afl ep | 114 | GACCGUCUUGUCAUCUCUACA        | 21 | 0 | 0 | 0 | 0 | 2  | 2  |
| siRNA_1497235 | - | afl ep | 115 | ACCGUCUUGUCAUCUCUACAGCCAU    | 25 | 0 | 0 | 0 | 1 | 0  | 0  |
| siRNA_980533  | - | afl ep | 115 | ACCGUCUUGUCAUCUCUAC          | 19 | 0 | 0 | 0 | 2 | 0  | 0  |
| siRNA_2031198 | - | afl ep | 115 | ACCGUCUUGUCAUCUCUACAGC       | 22 | 0 | 0 | 0 | 0 | 0  | 1  |
| siRNA_729118  | - | afl ep | 115 | ACCGUCUUGUCAUCUCUACAGCC      | 23 | 0 | 0 | 0 | 1 | 1  | 1  |
| siRNA_1313024 | - | afl ep | 115 | ACCGUCUUGUCAUCUCUACAG        | 21 | 0 | 0 | 0 | 0 | 0  | 1  |
| siRNA_372012  | + | afl ep | 115 | ACCGUCUUGUCAUCUCUACAGC       | 22 | 0 | 0 | 0 | 0 | 1  | 4  |
| siRNA_38321   | - | afl ep | 115 | ACCGUCUUGUCAUCUCUACAGCCA     | 24 | 0 | 0 | 0 | 2 | 17 | 37 |
| siRNA_3161304 | - | afl ep | 116 | CCGUCUUGUCAUCUCUACAGCC       | 22 | 0 | 0 | 0 | 0 | 0  | 1  |
| siRNA_2682933 | - | afl ep | 116 | CCGUCUUGUCAUCUCUACAGCCA      | 23 | 0 | 0 | 0 | 1 | 0  | 1  |
| siRNA_986414  | - | afl ep | 116 | CCGUCUUGUCAUCUCUACAGCCAU     | 24 | 0 | 0 | 1 | 1 | 0  | 1  |
| siRNA_1529241 | + | afl ep | 116 | CCGUCUUGUCAUCUCUACAGCC       | 22 | 0 | 0 | 0 | 0 | 0  | 1  |
| siRNA_649423  | + | afl ep | 116 | CCGUCUUGUCAUCUCUACAGC        | 21 | 0 | 0 | 0 | 0 | 1  | 1  |
| siRNA_1112453 | + | afl ep | 116 | CCGUCUUGUCAUCUCUACAGCCAUCCCC | 28 | 0 | 0 | 0 | 0 | 0  | 1  |
| siRNA_3717693 | - | afl ep | 117 | CGUCUUGUCAUCUCUACAGCC        | 21 | 0 | 0 | 0 | 0 | 1  | 0  |
| siRNA_2199939 | + | afl ep | 117 | CGUCUUGUCAUCUCUACAGCC        | 21 | 0 | 0 | 0 | 0 | 0  | 1  |
| siRNA_547008  | + | afl ep | 117 | CGUCUUGUCAUCUCUACAGCCAUU     | 24 | 0 | 0 | 0 | 0 | 2  | 1  |
| siRNA_546816  | - | afl ep | 117 | CGUCUUGUCAUCUCUACAGCCAUU     | 24 | 0 | 0 | 0 | 0 | 1  | 2  |
| siRNA_271224  | - | afl ep | 117 | CGUCUUGUCAUCUCUACAGCCA       | 22 | 0 | 0 | 1 | 0 | 3  | 4  |
| siRNA_4178587 | - | afl ep | 118 | GUCUUGUCAUCUCUACAGCCAUCCCC   | 26 | 0 | 0 | 1 | 0 | 0  | 0  |
| siRNA_2690639 | - | afl ep | 118 | GUCUUGUCAUCUCUACA            | 17 | 0 | 0 | 0 | 1 | 0  | 0  |
| siRNA_1796030 | - | afl ep | 118 | GUCUUGUCAUCUCUACAGCCAUCCC    | 25 | 0 | 0 | 0 | 0 | 1  | 0  |
| siRNA_2999896 | + | afl ep | 118 | GUCUUGUCAUCUCUACAGCCAUU      | 23 | 0 | 0 | 0 | 0 | 0  | 1  |
| siRNA_4217657 | + | afl ep | 118 | GUCUUGUCAUCUCUACAGCCAU       | 22 | 0 | 0 | 0 | 0 | 0  | 1  |
| siRNA_184654  | - | afl ep | 118 | GUCUUGUCAUCUCUACAGCCAU       | 22 | 0 | 0 | 1 | 0 | 4  | 6  |

|               |   |        |     |                               |    |   |   |   |   |    |    |
|---------------|---|--------|-----|-------------------------------|----|---|---|---|---|----|----|
| siRNA_129536  | - | afl ep | 118 | GUCUUGUCAUCUCUACAGCCAUUC      | 24 | 0 | 0 | 0 | 0 | 6  | 9  |
| siRNA_38032   | - | afl ep | 118 | GUCUUGUCAUCUCUACAGCCA         | 21 | 0 | 0 | 0 | 0 | 18 | 38 |
| siRNA_3451361 | - | afl ep | 119 | UCUUGUCAUCUCUACAGCCAUUCCCCAGA | 29 | 0 | 0 | 1 | 0 | 0  | 0  |
| siRNA_1740538 | - | afl ep | 119 | UCUUGUCAUCUCUACAGCC           | 19 | 0 | 0 | 1 | 0 | 0  | 1  |
| siRNA_563026  | - | afl ep | 119 | UCUUGUCAUCUCUACAGCCA          | 20 | 0 | 0 | 0 | 1 | 1  | 2  |
| siRNA_646336  | + | afl ep | 119 | UCUUGUCAUCUCUACAGCCAUU        | 22 | 0 | 0 | 0 | 0 | 1  | 2  |
| siRNA_133405  | - | afl ep | 119 | UCUUGUCAUCUCUACAGCCAUUCC      | 24 | 0 | 0 | 0 | 0 | 6  | 8  |
| siRNA_96243   | - | afl ep | 119 | UCUUGUCAUCUCUACAGCCAU         | 21 | 0 | 0 | 1 | 2 | 9  | 9  |
| siRNA_98716   | - | afl ep | 119 | UCUUGUCAUCUCUACAGCCAUUC       | 23 | 0 | 0 | 0 | 0 | 8  | 12 |
| siRNA_65440   | - | afl ep | 119 | UCUUGUCAUCUCUACAGCCAUU        | 22 | 0 | 0 | 0 | 0 | 15 | 15 |
| siRNA_2625001 | - | afl ep | 120 | CUUGUCAUCUCUACAGCCAUU         | 21 | 0 | 0 | 0 | 0 | 1  | 0  |
| siRNA_3693027 | + | afl ep | 120 | CUUGUCAUCUCUACAGCCAUU         | 21 | 0 | 0 | 0 | 0 | 1  | 0  |
| siRNA_1195425 | + | afl ep | 120 | CUUGUCAUCUCUACAGCCAUUCCC      | 24 | 0 | 0 | 0 | 0 | 1  | 1  |
| siRNA_1374998 | - | afl ep | 120 | CUUGUCAUCUCUACAGCCAUUC        | 22 | 0 | 0 | 0 | 0 | 0  | 2  |
| siRNA_972139  | - | afl ep | 121 | UUGUCAUCUCUACAGCCA            | 18 | 0 | 0 | 0 | 2 | 0  | 0  |
| siRNA_2794754 | + | afl ep | 121 | UUGUCAUCUCUACAGCCAUUCCCC      | 24 | 0 | 0 | 0 | 0 | 0  | 1  |
| siRNA_1228165 | + | afl ep | 121 | UUGUCAUCUCUACAGCCAUUC         | 21 | 0 | 0 | 0 | 0 | 1  | 1  |
| siRNA_718189  | + | afl ep | 121 | UUGUCAUCUCUACAGCCAUUCCC       | 23 | 0 | 0 | 0 | 0 | 0  | 2  |
| siRNA_300276  | + | afl ep | 121 | UUGUCAUCUCUACAGCCAUUCC        | 22 | 0 | 0 | 0 | 0 | 2  | 4  |
| siRNA_713703  | - | afl ep | 122 | UGUCAUCUCUACAGCCAUUCCCC       | 23 | 0 | 0 | 0 | 3 | 0  | 0  |
| siRNA_1494944 | - | afl ep | 122 | UGUCAUCUCUACAGCCAUUC          | 20 | 0 | 0 | 0 | 0 | 0  | 1  |
| siRNA_2892684 | + | afl ep | 122 | UGUCAUCUCUACAGCCAUUCC         | 21 | 0 | 0 | 0 | 0 | 0  | 1  |
| siRNA_840759  | - | afl ep | 122 | UGUCAUCUCUACAGCCAUUCCC        | 22 | 0 | 0 | 1 | 0 | 0  | 1  |
| siRNA_584225  | - | afl ep | 122 | UGUCAUCUCUACAGCCAUUCCCCA      | 24 | 0 | 0 | 0 | 1 | 1  | 3  |
| siRNA_285142  | - | afl ep | 122 | UGUCAUCUCUACAGCCAUUCC         | 21 | 0 | 0 | 0 | 0 | 4  | 3  |
| siRNA_3057209 | - | afl ep | 123 | GUCAUCUCUACAGCCAUU            | 18 | 0 | 0 | 1 | 0 | 0  | 0  |
| siRNA_3798662 | - | afl ep | 123 | GUCAUCUCUACAGCCAU             | 17 | 0 | 0 | 0 | 1 | 0  | 0  |
| siRNA_1820983 | - | afl ep | 123 | GUCAUCUCUACAGCCAUUCC          | 20 | 0 | 0 | 0 | 0 | 1  | 0  |
| siRNA_594300  | - | afl ep | 123 | GUCAUCUCUACAGCCAUUCCCC        | 22 | 0 | 0 | 1 | 0 | 1  | 1  |
| siRNA_2047010 | + | afl ep | 123 | GUCAUCUCUACAGCCAUUCCC         | 21 | 0 | 0 | 0 | 0 | 0  | 1  |
| siRNA_436166  | - | afl ep | 123 | GUCAUCUCUACAGCCAUUCCC         | 21 | 0 | 0 | 0 | 1 | 1  | 2  |
| siRNA_2036398 | - | afl ep | 124 | UCAUCUCUACAGCCAUUCCCC         | 21 | 0 | 0 | 0 | 1 | 0  | 0  |
| siRNA_1958686 | - | afl ep | 124 | UCAUCUCUACAGCCAUUCCCCA        | 22 | 0 | 0 | 0 | 0 | 1  | 1  |
| siRNA_2176124 | + | afl ep | 124 | UCAUCUCUACAGCCAUUCCC          | 20 | 0 | 0 | 0 | 0 | 0  | 1  |
| siRNA_2891644 | - | afl ep | 124 | UCAUCUCUACAGCCAUUCCCCAGA      | 24 | 0 | 0 | 0 | 0 | 0  | 1  |
| siRNA_2565266 | + | afl ep | 124 | UCAUCUCUACAGCCAUUCCCCA        | 22 | 0 | 0 | 0 | 0 | 0  | 1  |
| siRNA_3086028 | + | afl ep | 124 | UCAUCUCUACAGCCAUUCCCCAGA      | 24 | 0 | 0 | 0 | 0 | 0  | 1  |
| siRNA_251168  | + | afl ep | 124 | UCAUCUCUACAGCCAUUCCCC         | 21 | 0 | 0 | 0 | 0 | 3  | 6  |
| siRNA_3232950 | + | afl ep | 125 | CAUCUCUACAGCCAUUCCCC          | 20 | 0 | 0 | 0 | 0 | 0  | 1  |
| siRNA_1423799 | - | afl ep | 125 | CAUCUCUACAGCCAUUCCCCAGAU      | 24 | 0 | 0 | 0 | 0 | 0  | 1  |
| siRNA_1296631 | - | afl ep | 125 | CAUCUCUACAGCCAUUCCCCA         | 21 | 0 | 0 | 0 | 0 | 1  | 1  |

|               |   |        |     |                                     |    |   |   |   |   |   |   |
|---------------|---|--------|-----|-------------------------------------|----|---|---|---|---|---|---|
| siRNA_2027708 | + | afl ep | 126 | AUCUCUACAGCCAUUCCCCAGA              | 22 | 0 | 0 | 0 | 0 | 0 | 1 |
| siRNA_1215939 | - | afl ep | 126 | AUCUCUACAGCCAUUCCCCAG               | 21 | 0 | 0 | 0 | 0 | 0 | 1 |
| siRNA_2650329 | - | afl ep | 127 | UCUCUACAGCCAUUCCCCAGA               | 21 | 0 | 0 | 0 | 1 | 0 | 0 |
| siRNA_4185026 | - | afl ep | 127 | UCUCUACAGCCAUUCCCCAGAUACGGA         | 28 | 0 | 0 | 0 | 1 | 0 | 0 |
| siRNA_3313380 | + | afl ep | 127 | UCUCUACAGCCAUUCCCCA                 | 19 | 0 | 0 | 0 | 1 | 0 | 0 |
| siRNA_805044  | - | afl ep | 127 | UCUCUACAGCCAUUCCCC                  | 18 | 0 | 0 | 1 | 1 | 0 | 0 |
| siRNA_845760  | - | afl ep | 127 | UCUCUACAGCCAUUCCCCAGAU              | 22 | 0 | 0 | 0 | 0 | 1 | 1 |
| siRNA_1818958 | - | afl ep | 127 | UCUCUACAGCCAUUCCCCAGAUCA            | 24 | 0 | 0 | 0 | 0 | 0 | 2 |
| siRNA_838459  | + | afl ep | 127 | UCUCUACAGCCAUUCCCCAGA               | 21 | 0 | 0 | 0 | 0 | 0 | 2 |
| siRNA_2586998 | - | afl ep | 128 | CUCUACAGCCAUUCCCCA                  | 18 | 0 | 0 | 0 | 1 | 0 | 0 |
| siRNA_3165063 | - | afl ep | 129 | UCUACAGCCAUUCCCCAGAU                | 20 | 0 | 0 | 0 | 1 | 0 | 0 |
| siRNA_3637026 | - | afl ep | 129 | UCUACAGCCAUUCCCCAGAUACG             | 24 | 0 | 0 | 1 | 0 | 0 | 0 |
| siRNA_1547223 | - | afl ep | 131 | UACAGCCAUUCCCCAGAU                  | 18 | 0 | 0 | 1 | 1 | 0 | 0 |
| siRNA_947778  | - | afl ep | 131 | UACAGCCAUUCCCCAGA                   | 17 | 0 | 0 | 0 | 2 | 0 | 0 |
| siRNA_3580499 | - | afl ep | 132 | ACAGCCAUUCCCCAGAU                   | 18 | 0 | 0 | 0 | 1 | 0 | 0 |
| siRNA_4261215 | - | afl ep | 132 | ACAGCCAUUCCCCAGA                    | 16 | 0 | 0 | 0 | 1 | 0 | 0 |
| siRNA_1150463 | - | afl ep | 132 | ACAGCCAUUCCCCAGAUACG                | 21 | 0 | 0 | 0 | 0 | 1 | 0 |
| siRNA_2721454 | - | afl ep | 133 | CAGCCAUUCCCCAGAUACGGACG             | 24 | 0 | 0 | 0 | 0 | 0 | 1 |
| siRNA_2468100 | - | afl ep | 134 | AGCCAUUCCCCAGAUACG                  | 19 | 0 | 0 | 0 | 1 | 0 | 0 |
| siRNA_2531031 | + | afl ep | 134 | AGCCAUUCCCCAGAUACGGACG              | 23 | 0 | 0 | 0 | 0 | 1 | 0 |
| siRNA_2135751 | - | afl ep | 134 | AGCCAUUCCCCAGAUACGGACGAAUCCCC       | 30 | 0 | 0 | 1 | 0 | 0 | 0 |
| siRNA_3412550 | + | afl ep | 134 | AGCCAUUCCCCAGAUACGGACGAA            | 25 | 0 | 0 | 0 | 0 | 0 | 1 |
| siRNA_380400  | - | afl ep | 134 | AGCCAUUCCCCAGAUACGGGA               | 21 | 0 | 0 | 0 | 0 | 1 | 4 |
| siRNA_4036193 | - | afl ep | 135 | GCCAUUCCCCAGAUACGCG                 | 19 | 0 | 0 | 1 | 1 | 0 | 0 |
| siRNA_2082033 | - | afl ep | 135 | GCCAUUCCCCAGAUACG                   | 18 | 0 | 0 | 0 | 2 | 0 | 0 |
| siRNA_3052562 | - | afl ep | 135 | GCCAUUCCCCAGAUACGGACGAA             | 24 | 0 | 0 | 1 | 0 | 0 | 0 |
| siRNA_710035  | - | afl ep | 135 | GCCAUUCCCCAGAUACGGACG               | 22 | 0 | 0 | 0 | 1 | 2 | 0 |
| siRNA_1217006 | - | afl ep | 135 | GCCAUUCCCCAGAUACGGGA                | 20 | 0 | 0 | 0 | 0 | 1 | 0 |
| siRNA_2053172 | + | afl ep | 135 | GCCAUUCCCCAGAUACGGACGAAUCCCCUGCAUCU | 36 | 0 | 0 | 0 | 0 | 0 | 1 |
| siRNA_789333  | + | afl ep | 135 | GCCAUUCCCCAGAUACGGACGAA             | 24 | 0 | 0 | 0 | 0 | 0 | 2 |
| siRNA_3626405 | - | afl ep | 136 | CCAUUCCCCAGAUACG                    | 17 | 0 | 0 | 1 | 0 | 0 | 0 |
| siRNA_1592518 | + | afl ep | 136 | CCAUUCCCCAGAUACGGACGAAU             | 24 | 0 | 0 | 0 | 0 | 1 | 0 |
| siRNA_1275201 | + | afl ep | 137 | CAUUCCCCAGAUACGGACGAAUC             | 24 | 0 | 0 | 0 | 0 | 1 | 1 |
| siRNA_859994  | + | afl ep | 137 | CAUUCCCCAGAUACGGACGA                | 21 | 0 | 0 | 0 | 0 | 0 | 2 |
| siRNA_3470799 | + | afl ep | 138 | AUUCCCCAGAUACGGACGAAUCC             | 24 | 0 | 0 | 0 | 0 | 0 | 1 |
| siRNA_3570496 | + | afl ep | 138 | AUUCCCCAGAUACGGACGAAUC              | 23 | 0 | 0 | 0 | 0 | 0 | 1 |
| siRNA_3452446 | - | afl ep | 139 | UUCCCCAGAUACGGACGAAUCCCCUGCA        | 29 | 0 | 0 | 0 | 1 | 0 | 0 |
| siRNA_2869053 | - | afl ep | 139 | UUCCCCAGAUACGGACGAAUCC              | 23 | 0 | 0 | 0 | 0 | 1 | 0 |
| siRNA_2079702 | + | afl ep | 139 | UUCCCCAGAUACGGACGAAUCCCC            | 25 | 0 | 0 | 0 | 1 | 1 | 0 |
| siRNA_3488956 | - | afl ep | 139 | UUCCCCAGAUACGGACGAAU                | 21 | 0 | 0 | 0 | 0 | 0 | 1 |
| siRNA_687997  | + | afl ep | 139 | UUCCCCAGAUACGGACGAAUC               | 22 | 0 | 0 | 0 | 0 | 3 | 1 |

|               |   |        |     |                               |    |   |   |   |    |    |    |
|---------------|---|--------|-----|-------------------------------|----|---|---|---|----|----|----|
| siRNA_497221  | - | afl ep | 139 | UCCCCAGAUACGGACGAAUCCCC       | 25 | 0 | 0 | 0 | 2  | 0  | 1  |
| siRNA_455199  | + | afl ep | 139 | UCCCCAGAUACGGACGAAUCCCC       | 24 | 0 | 0 | 0 | 0  | 1  | 4  |
| siRNA_3108343 | - | afl ep | 140 | UCCCCAGAUACGGA                | 15 | 0 | 0 | 0 | 1  | 0  | 0  |
| siRNA_2179490 | - | afl ep | 140 | UCCCCAGAUACGGACGAAUCCCCUG     | 26 | 0 | 0 | 0 | 1  | 0  | 0  |
| siRNA_2071116 | - | afl ep | 140 | UCCCCAGAUACGGACGAAUCCCCUGC    | 27 | 0 | 0 | 1 | 1  | 0  | 0  |
| siRNA_751646  | - | afl ep | 140 | UCCCCAGAUACGGACGAAUCCCCUGCA   | 28 | 0 | 0 | 1 | 2  | 0  | 0  |
| siRNA_638179  | - | afl ep | 140 | UCCCCAGAUACGGACG              | 17 | 0 | 0 | 1 | 2  | 0  | 0  |
| siRNA_618831  | - | afl ep | 140 | UCCCCAGAUACGGACGAAUCCCC       | 23 | 0 | 0 | 1 | 1  | 1  | 0  |
| siRNA_485416  | - | afl ep | 140 | UCCCCAGAUACGGACGAAUCC         | 22 | 0 | 0 | 0 | 2  | 1  | 0  |
| siRNA_4204797 | - | afl ep | 140 | UCCCCAGAUACGGACGAAUCCCCUGCAUC | 30 | 0 | 0 | 0 | 1  | 0  | 0  |
| siRNA_667225  | - | afl ep | 140 | UCCCCAGAUACGGACGAAUCCCCU      | 25 | 0 | 0 | 2 | 0  | 0  | 1  |
| siRNA_106715  | - | afl ep | 140 | UCCCCAGAUACGGACGAAUCCCC       | 24 | 0 | 0 | 4 | 12 | 1  | 1  |
| siRNA_492842  | - | afl ep | 140 | UCCCCAGAUACGGACGAAUC          | 21 | 0 | 0 | 1 | 1  | 1  | 1  |
| siRNA_718606  | + | afl ep | 140 | UCCCCAGAUACGGACGAAUCCCC       | 24 | 0 | 0 | 0 | 0  | 1  | 2  |
| siRNA_660477  | + | afl ep | 140 | UCCCCAGAUACGGACGAAUCC         | 22 | 0 | 0 | 0 | 0  | 1  | 2  |
| siRNA_447358  | + | afl ep | 140 | UCCCCAGAUACGGACGAAUC          | 21 | 0 | 0 | 0 | 0  | 1  | 4  |
| siRNA_2230712 | - | afl ep | 141 | CCCCAGAUACGGACGAAUCCCCUGCA    | 27 | 0 | 0 | 0 | 1  | 0  | 0  |
| siRNA_929123  | - | afl ep | 141 | CCCCAGAUACGGACGAAUCCCC        | 23 | 0 | 0 | 0 | 2  | 0  | 0  |
| siRNA_1518891 | + | afl ep | 141 | CCCCAGAUACGGACGAAUC           | 20 | 0 | 0 | 0 | 0  | 1  | 0  |
| siRNA_2148374 | - | afl ep | 141 | CCCCAGAUACGGACGAAUC           | 20 | 0 | 0 | 0 | 0  | 0  | 1  |
| siRNA_721914  | - | afl ep | 141 | CCCCAGAUACGGACGAAUCCCCU       | 24 | 0 | 0 | 0 | 1  | 0  | 1  |
| siRNA_464732  | + | afl ep | 141 | CCCCAGAUACGGACGAAUCCCCU       | 24 | 0 | 0 | 0 | 0  | 2  | 2  |
| siRNA_519157  | - | afl ep | 141 | CCCCAGAUACGGACGAAUCC          | 21 | 0 | 0 | 0 | 0  | 1  | 3  |
| siRNA_139423  | + | afl ep | 141 | CCCCAGAUACGGACGAAUCC          | 21 | 0 | 0 | 0 | 0  | 5  | 9  |
| siRNA_111878  | + | afl ep | 141 | CCCCAGAUACGGACGAAUCCCC        | 23 | 0 | 0 | 0 | 1  | 7  | 9  |
| siRNA_113005  | + | afl ep | 141 | CCCCAGAUACGGACGAAUCCC         | 22 | 0 | 0 | 0 | 1  | 6  | 11 |
| siRNA_2105557 | + | afl ep | 142 | CCCAGAUACGGACGAAUCCCCU        | 23 | 0 | 0 | 0 | 0  | 1  | 0  |
| siRNA_1216799 | - | afl ep | 142 | CCCAGAUACGGACGAAUCCCCUG       | 24 | 0 | 0 | 0 | 1  | 0  | 1  |
| siRNA_1151926 | - | afl ep | 142 | CCCAGAUACGGACGAAUCCC          | 21 | 0 | 0 | 0 | 0  | 1  | 1  |
| siRNA_481823  | - | afl ep | 142 | CCCAGAUACGGACGAAUCCCC         | 22 | 0 | 0 | 1 | 2  | 0  | 1  |
| siRNA_899357  | + | afl ep | 142 | CCCAGAUACGGACGAAUCC           | 20 | 0 | 0 | 0 | 1  | 0  | 2  |
| siRNA_467223  | - | afl ep | 142 | CCCAGAUACGGACGAAUCCCCU        | 23 | 0 | 0 | 0 | 0  | 1  | 4  |
| siRNA_128820  | + | afl ep | 142 | CCCAGAUACGGACGAAUCCCC         | 22 | 0 | 0 | 1 | 1  | 4  | 11 |
| siRNA_61031   | + | afl ep | 142 | CCCAGAUACGGACGAAUCCC          | 21 | 0 | 0 | 1 | 2  | 14 | 18 |
| siRNA_1677834 | - | afl ep | 143 | CCAGAUACGGACGAAUCC            | 19 | 0 | 0 | 0 | 0  | 0  | 1  |
| siRNA_477960  | - | afl ep | 143 | CCAGAUACGGACGAAUCCCCUG        | 23 | 0 | 0 | 0 | 1  | 2  | 1  |
| siRNA_435445  | - | afl ep | 143 | CCAGAUACGGACGAAUCCCCUGC       | 24 | 0 | 0 | 0 | 1  | 2  | 1  |
| siRNA_435358  | + | afl ep | 143 | CCAGAUACGGACGAAUCCCCUGC       | 24 | 0 | 0 | 0 | 0  | 3  | 2  |
| siRNA_1007440 | + | afl ep | 143 | CCAGAUACGGACGAAUCCCC          | 21 | 0 | 0 | 0 | 0  | 0  | 2  |
| siRNA_585192  | + | afl ep | 143 | CCAGAUACGGACGAAUCCCCU         | 22 | 0 | 0 | 0 | 0  | 0  | 3  |
| siRNA_358897  | - | afl ep | 143 | CCAGAUACGGACGAAUCCCCU         | 22 | 0 | 0 | 0 | 0  | 2  | 4  |

|               |   |        |     |                                 |    |   |   |   |   |    |    |
|---------------|---|--------|-----|---------------------------------|----|---|---|---|---|----|----|
| siRNA_279405  | - | afl ep | 143 | CCAGAUACGGACGAAUCCCC            | 21 | 0 | 0 | 0 | 0 | 3  | 4  |
| siRNA_3318867 | + | afl ep | 144 | CAGAUACGGACGAAUCCCCUG           | 22 | 0 | 0 | 0 | 0 | 0  | 1  |
| siRNA_682908  | + | afl ep | 144 | CAGAUACGGACGAAUCCCCUGC          | 23 | 0 | 0 | 0 | 0 | 1  | 2  |
| siRNA_487799  | + | afl ep | 144 | CAGAUACGGACGAAUCCCCU            | 21 | 0 | 0 | 0 | 0 | 2  | 2  |
| siRNA_2742687 | - | afl ep | 145 | AGAUACGGACGAAUCCCC              | 19 | 0 | 0 | 0 | 1 | 0  | 0  |
| siRNA_1676535 | - | afl ep | 145 | AGAUACGGACGAAU                  | 15 | 0 | 0 | 0 | 1 | 0  | 0  |
| siRNA_4113344 | - | afl ep | 145 | AGAUACGGACGAAUCCC               | 18 | 0 | 0 | 0 | 0 | 0  | 1  |
| siRNA_669374  | + | afl ep | 145 | AGAUACGGACGAAUCCCCUGC           | 22 | 0 | 0 | 0 | 0 | 1  | 3  |
| siRNA_3573952 | + | afl ep | 146 | GAUCACGGACGAAUCCCC              | 18 | 0 | 0 | 0 | 1 | 0  | 0  |
| siRNA_1297856 | - | afl ep | 146 | GAUCACGGACGAAUCCCC              | 18 | 0 | 0 | 0 | 1 | 0  | 0  |
| siRNA_696220  | - | afl ep | 146 | GAUCACGGACGAAUCCCCUGCAUC        | 24 | 0 | 0 | 0 | 1 | 1  | 0  |
| siRNA_364392  | + | afl ep | 146 | GAUCACGGACGAAUCCCCUGC           | 21 | 0 | 0 | 0 | 0 | 2  | 3  |
| siRNA_752177  | + | afl ep | 147 | AUCACGGACGAAUCCCCUGCAUCU        | 24 | 0 | 0 | 0 | 0 | 1  | 2  |
| siRNA_2042187 | + | afl ep | 148 | UCACGGACGAAUCCCCU               | 17 | 0 | 0 | 0 | 1 | 0  | 1  |
| siRNA_589974  | + | afl ep | 148 | UCACGGACGAAUCCCCUGCAUCU         | 23 | 0 | 0 | 0 | 0 | 2  | 1  |
| siRNA_1573328 | + | afl ep | 148 | UCACGGACGAAUCCCCUGCAU           | 21 | 0 | 0 | 0 | 0 | 0  | 1  |
| siRNA_847245  | + | afl ep | 148 | UCACGGACGAAUCCCCUGC             | 19 | 0 | 0 | 0 | 0 | 0  | 2  |
| siRNA_112565  | + | afl ep | 148 | UCACGGACGAAUCCCCUGCAUC          | 22 | 0 | 0 | 0 | 0 | 6  | 11 |
| siRNA_2530813 | - | afl ep | 149 | CACGGACGAAUCCCCUGCAUCU          | 22 | 0 | 0 | 1 | 0 | 0  | 0  |
| siRNA_1880248 | + | afl ep | 149 | CACGGACGAAUCCCCUGCAUCU          | 22 | 0 | 0 | 0 | 0 | 0  | 1  |
| siRNA_768578  | + | afl ep | 149 | CACGGACGAAUCCCCUGCAUC           | 21 | 0 | 0 | 0 | 0 | 2  | 1  |
| siRNA_2606296 | - | afl ep | 150 | ACGGACGAAUCCCCUGCAUCUACG        | 24 | 0 | 0 | 0 | 0 | 0  | 1  |
| siRNA_3383930 | + | afl ep | 150 | ACGGACGAAUCCCCUGCAUCUACG        | 24 | 0 | 0 | 0 | 0 | 0  | 1  |
| siRNA_718881  | + | afl ep | 150 | ACGGACGAAUCCCCUGCAUCU           | 21 | 0 | 0 | 0 | 0 | 0  | 2  |
| siRNA_1501704 | + | afl ep | 151 | CGGACGAAUCCCCUGCAUC             | 19 | 0 | 0 | 1 | 0 | 0  | 0  |
| siRNA_1685870 | + | afl ep | 151 | CGGACGAAUCCCCUGCAUCUAC          | 22 | 0 | 0 | 0 | 0 | 0  | 1  |
| siRNA_867669  | + | afl ep | 151 | CGGACGAAUCCCCUGCAUCUA           | 21 | 0 | 0 | 0 | 0 | 0  | 2  |
| siRNA_419918  | + | afl ep | 151 | CGGACGAAUCCCCUGCAUCUACGC        | 24 | 0 | 0 | 0 | 0 | 1  | 4  |
| siRNA_2865212 | - | afl ep | 152 | GGACGAAUCCCCUGCAUCU             | 19 | 0 | 0 | 1 | 0 | 0  | 0  |
| siRNA_3449884 | - | afl ep | 152 | GGACGAAUCCCCUGCAUCUACGCGCACGC   | 29 | 0 | 0 | 1 | 0 | 0  | 0  |
| siRNA_1975590 | - | afl ep | 152 | GGACGAAUCCCCUGCAUCUACGCGCACGCAU | 31 | 0 | 0 | 1 | 1 | 0  | 0  |
| siRNA_851079  | - | afl ep | 152 | GGACGAAUCCCCUGCA                | 16 | 0 | 0 | 0 | 2 | 0  | 0  |
| siRNA_873898  | - | afl ep | 152 | GGACGAAUCCCCUGCAUC              | 18 | 0 | 0 | 0 | 1 | 0  | 0  |
| siRNA_1996583 | - | afl ep | 152 | GGACGAAUCCCCUGCAUCUA            | 20 | 0 | 0 | 0 | 0 | 0  | 1  |
| siRNA_397249  | - | afl ep | 152 | GGACGAAUCCCCUGCAUCUACGCG        | 24 | 0 | 0 | 1 | 0 | 2  | 2  |
| siRNA_590927  | - | afl ep | 152 | GGACGAAUCCCCUGCAUCUACGC         | 23 | 0 | 0 | 0 | 0 | 0  | 4  |
| siRNA_125834  | - | afl ep | 152 | GGACGAAUCCCCUGCAUCUAC           | 21 | 0 | 0 | 0 | 0 | 7  | 8  |
| siRNA_61878   | - | afl ep | 152 | GGACGAAUCCCCUGCAUCUACG          | 22 | 0 | 0 | 1 | 0 | 10 | 23 |
| siRNA_3053404 | - | afl ep | 153 | GACGAAUCCCCUGCAUCUACGC          | 22 | 0 | 0 | 0 | 1 | 0  | 1  |
| siRNA_492032  | - | afl ep | 153 | GACGAAUCCCCUGCAUCUACG           | 21 | 0 | 0 | 0 | 2 | 2  | 1  |
| siRNA_1108219 | + | afl ep | 153 | GACGAAUCCCCUGCAUCUACGC          | 22 | 0 | 0 | 0 | 0 | 0  | 2  |

|               |   |              |     |                                   |    |   |   |   |   |   |   |
|---------------|---|--------------|-----|-----------------------------------|----|---|---|---|---|---|---|
| siRNA_1494263 | - | <i>afl J</i> | 154 | ACGAAUCCCCUGCAUCUACGC             | 21 | 0 | 0 | 0 | 0 | 0 | 1 |
| siRNA_1330108 | + | <i>afl J</i> | 154 | ACGAAUCCCCUGCAUCUACGC             | 21 | 0 | 0 | 0 | 0 | 0 | 2 |
| siRNA_733352  | + | <i>afl J</i> | 155 | CGAAUCCCCUGCAUCUACGCGC            | 22 | 0 | 0 | 0 | 0 | 2 | 1 |
| siRNA_3234419 | + | <i>afl J</i> | 157 | AAUCCCCUGCAUCUACGCGCACGC          | 24 | 0 | 0 | 0 | 0 | 0 | 1 |
| siRNA_2090072 | - | <i>afl J</i> | 157 | AAUCCCCUGCAUCUACGCGCAC            | 22 | 0 | 0 | 0 | 0 | 0 | 1 |
| siRNA_3604658 | - | <i>afl J</i> | 204 | AACAGCAACACAACCUGUCCUCGAUGCGGCUC  | 32 | 0 | 0 | 1 | 0 | 0 | 0 |
| siRNA_1613138 | - | <i>afl J</i> | 204 | AACAGCAACACAACCUGUCCUCGAUGCGGCUCA | 33 | 0 | 0 | 1 | 0 | 0 | 0 |
| siRNA_1025590 | - | <i>afl J</i> | 213 | ACAACCUGUCCUCGAUGCGGCUC           | 23 | 0 | 0 | 1 | 1 | 0 | 0 |
| siRNA_1078570 | - | <i>afl J</i> | 213 | ACAACCUGUCCUCGAUGCGGCUCA          | 24 | 0 | 0 | 0 | 0 | 1 | 0 |
| siRNA_471898  | + | <i>afl J</i> | 214 | CAACCUGUCCUCGAUGCGGCUC            | 22 | 0 | 0 | 0 | 0 | 0 | 4 |
| siRNA_2045353 | + | <i>afl J</i> | 216 | ACCUGUCCUCGAUGCGGCUCAAU           | 24 | 0 | 0 | 0 | 0 | 1 | 0 |
| siRNA_3512880 | + | <i>afl J</i> | 216 | ACCUGUCCUCGAUGCGGCUC              | 20 | 0 | 0 | 0 | 0 | 0 | 1 |
| siRNA_4040742 | - | <i>afl J</i> | 216 | ACCUGUCCUCGAUGCGGCUCA             | 21 | 0 | 0 | 0 | 0 | 0 | 1 |
| siRNA_1326343 | + | <i>afl J</i> | 217 | CCUGUCCUCGAUGCGGCUCAA             | 21 | 0 | 0 | 0 | 0 | 1 | 1 |
| siRNA_3014928 | - | <i>afl J</i> | 219 | UGUCCUCGAUGCGGCUCA                | 18 | 0 | 0 | 0 | 1 | 0 | 0 |
| siRNA_3328580 | - | <i>afl J</i> | 219 | UGUCCUCGAUGCGGCUCAAU              | 21 | 0 | 0 | 0 | 1 | 0 | 0 |
| siRNA_2029559 | + | <i>afl J</i> | 219 | UGUCCUCGAUGCGGCUCAAU              | 21 | 0 | 0 | 0 | 0 | 0 | 1 |
| siRNA_1646183 | - | <i>afl J</i> | 220 | GUCCUCGAUGCGGCUCAAU               | 19 | 0 | 0 | 1 | 1 | 0 | 0 |
| siRNA_1762685 | - | <i>afl J</i> | 220 | GUCCUCGAUGCGGCUCA                 | 17 | 0 | 0 | 0 | 1 | 0 | 0 |
| siRNA_1065777 | - | <i>afl J</i> | 220 | GUCCUCGAUGCGGCUCAAU               | 20 | 0 | 0 | 1 | 0 | 0 | 0 |
| siRNA_929941  | - | <i>afl J</i> | 220 | GUCCUCGAUGCGGCUCAA                | 18 | 0 | 0 | 1 | 1 | 0 | 1 |
| siRNA_2344595 | + | <i>afl J</i> | 220 | GUCCUCGAUGCGGCUCAAUCAAGG          | 24 | 0 | 0 | 0 | 0 | 0 | 1 |
| siRNA_1569753 | - | <i>afl J</i> | 220 | GUCCUCGAUGCGGCUCAAUCA             | 21 | 0 | 0 | 0 | 0 | 0 | 1 |
| siRNA_994754  | - | <i>afl J</i> | 220 | GUCCUCGAUGCGGCUCAAUCAA            | 22 | 0 | 0 | 0 | 0 | 0 | 2 |
| siRNA_1224860 | - | <i>afl J</i> | 221 | UCCUCGAUGCGGCUCAAU                | 18 | 0 | 0 | 1 | 1 | 0 | 0 |
| siRNA_570503  | - | <i>afl J</i> | 221 | UCCUCGAUGCGGCUCAAUCAA             | 21 | 0 | 0 | 0 | 0 | 1 | 2 |
| siRNA_2472488 | + | <i>afl J</i> | 222 | CCUCGAUGCGGCUCAAUCAAGGC           | 23 | 0 | 0 | 0 | 0 | 1 | 0 |
| siRNA_2403672 | + | <i>afl J</i> | 222 | CCUCGAUGCGGCUCAAUCAAGG            | 22 | 0 | 0 | 0 | 0 | 0 | 1 |
| siRNA_953324  | + | <i>afl J</i> | 223 | CUCGAUGCGGCUCAAUCAAGG             | 21 | 0 | 0 | 0 | 0 | 2 | 0 |
| siRNA_3463226 | + | <i>afl J</i> | 223 | CUCGAUGCGGCUCAAUCAAGGCAACU        | 26 | 0 | 0 | 0 | 0 | 0 | 1 |
| siRNA_141931  | + | <i>afl J</i> | 223 | CUCGAUGCGGCUCAAUCAAGGC            | 22 | 0 | 0 | 0 | 0 | 4 | 9 |
| siRNA_4178977 | + | <i>afl J</i> | 224 | UCGAUGCGGCUCAAUCAAGGCAAC          | 24 | 0 | 0 | 0 | 0 | 0 | 1 |
| siRNA_306834  | + | <i>afl J</i> | 224 | UCGAUGCGGCUCAAUCAAGGC             | 21 | 0 | 0 | 0 | 0 | 2 | 5 |
| siRNA_3514791 | + | <i>afl J</i> | 225 | CGAUGCGGCUCAAUCAAGGCAACU          | 24 | 0 | 0 | 0 | 0 | 1 | 0 |
| siRNA_1221403 | + | <i>pks A</i> | 227 | AUGCGGCUCAAUCAAGGCAACU            | 22 | 0 | 0 | 0 | 0 | 1 | 1 |
| siRNA_568285  | + | <i>pks A</i> | 227 | AUGCGGCUCAAUCAAGGCAACUCU          | 24 | 0 | 0 | 0 | 0 | 1 | 3 |
| siRNA_2246700 | - | <i>pks A</i> | 228 | UGCGGCUCAAUCAAGGCAACUC            | 22 | 0 | 0 | 0 | 1 | 0 | 0 |
| siRNA_1094892 | + | <i>pks A</i> | 228 | UGCGGCUCAAUCAAGGCAACUCU           | 24 | 0 | 0 | 0 | 0 | 1 | 0 |
| siRNA_3109786 | + | <i>pks A</i> | 228 | UGCGGCUCAAUCAAGGCAACU             | 21 | 0 | 0 | 0 | 0 | 0 | 1 |
| siRNA_2633760 | + | <i>pks A</i> | 228 | UGCGGCUCAAUCAAGGCAACUCU           | 23 | 0 | 0 | 0 | 0 | 0 | 1 |
| siRNA_4286640 | + | <i>pks A</i> | 228 | UGCGGCUCAAUCAAGGCAACUC            | 22 | 0 | 0 | 0 | 0 | 0 | 1 |

|               |   |              |     |                                     |    |   |   |   |    |   |   |
|---------------|---|--------------|-----|-------------------------------------|----|---|---|---|----|---|---|
| siRNA_2218969 | - | <i>pks A</i> | 229 | GCGGCUCAAUCAAGGCAACUC               | 21 | 0 | 0 | 1 | 0  | 0 | 0 |
| siRNA_4196304 | - | <i>pks A</i> | 229 | GCGGCUCAAUCAAGGCAACUCU              | 22 | 0 | 0 | 0 | 1  | 0 | 0 |
| siRNA_2447000 | + | <i>pks A</i> | 229 | GCGGCUCAAUCAAGGCAACUCU              | 22 | 0 | 0 | 0 | 0  | 0 | 1 |
| siRNA_1970742 | + | <i>pks A</i> | 229 | GCGGCUCAAUCAAGGCAACU                | 20 | 0 | 0 | 0 | 0  | 0 | 1 |
| siRNA_1516049 | + | <i>pks A</i> | 294 | CAGUUUACUAUCCGUCCAGGCCAC            | 24 | 0 | 0 | 0 | 0  | 0 | 1 |
| siRNA_988669  | - | <i>pks A</i> | 295 | AGUUUACUAUCCGUCCAGGCCACG            | 24 | 0 | 0 | 0 | 0  | 1 | 1 |
| siRNA_3187282 | - | <i>pks A</i> | 296 | GUUUACUAUCCGUCCAGGCCACGG            | 24 | 0 | 0 | 0 | 0  | 1 | 0 |
| siRNA_1393545 | - | <i>pks A</i> | 296 | GUUUACUAUCCGUCCAGGCCAC              | 22 | 0 | 0 | 0 | 0  | 0 | 1 |
| siRNA_3779271 | + | <i>pks A</i> | 297 | UUUACUAUCCGUCCAGGCCACG              | 22 | 0 | 0 | 0 | 0  | 0 | 1 |
| siRNA_1968147 | - | <i>pks A</i> | 299 | UACUAUCCGUCCAGGCCACGG               | 21 | 0 | 0 | 0 | 1  | 0 | 0 |
| siRNA_3270594 | + | <i>pks A</i> | 300 | ACUAUCCGUCCAGGCCACGGUAGGGAGGUUUGGGA | 38 | 0 | 0 | 0 | 0  | 0 | 1 |
| siRNA_1474562 | + | <i>pks A</i> | 301 | CUAUCCGUCCAGGCCACGGUAGGGAGGUUUGGGAC | 37 | 0 | 0 | 0 | 0  | 0 | 1 |
| siRNA_1856775 | - | <i>pks A</i> | 302 | UAUCCGUCCAGGCCACGGUAG               | 21 | 0 | 0 | 0 | 0  | 0 | 1 |
| siRNA_554542  | - | <i>pks A</i> | 303 | AUCCGUCCAGGCCACGG                   | 17 | 0 | 0 | 0 | 3  | 0 | 0 |
| siRNA_2647824 | - | <i>pks A</i> | 305 | CCGUCCAGGCCACGGUAGGGAGGUUU          | 26 | 0 | 0 | 1 | 0  | 0 | 0 |
| siRNA_3862497 | + | <i>pks A</i> | 306 | CGUCCAGGCCACGGUAGGGAGGUUUGGGACUC    | 32 | 0 | 0 | 0 | 0  | 1 | 0 |
| siRNA_1347615 | - | <i>pks A</i> | 306 | CGUCCAGGCCACGGUAGGGAGG              | 22 | 0 | 0 | 0 | 1  | 0 | 1 |
| siRNA_1091967 | - | <i>pks A</i> | 307 | GUCCAGGCCACGGUAGGGAGG               | 21 | 0 | 0 | 0 | 1  | 0 | 1 |
| siRNA_1151587 | - | <i>pks A</i> | 308 | UCCAGGCCACGGUAGGGAGG                | 20 | 0 | 0 | 1 | 2  | 0 | 0 |
| siRNA_3000545 | - | <i>pes 1</i> | 311 | AGGCCACGGUAGGGAGGUUUGGGACUC         | 27 | 0 | 0 | 0 | 1  | 0 | 0 |
| siRNA_3853660 | - | <i>pes 1</i> | 311 | AGGCCACGGUAGGGAGGUUUGGG             | 23 | 0 | 0 | 0 | 1  | 0 | 0 |
| siRNA_624279  | - | <i>pes 1</i> | 311 | AGGCCACGGUAGGGAGGUU                 | 19 | 0 | 0 | 0 | 3  | 0 | 0 |
| siRNA_376256  | - | <i>pes 1</i> | 311 | AGGCCACGGUAGGGAGGU                  | 18 | 0 | 0 | 1 | 5  | 0 | 0 |
| siRNA_182477  | - | <i>pes 1</i> | 311 | AGGCCACGGUAGGGAGG                   | 17 | 0 | 0 | 1 | 11 | 0 | 0 |
| siRNA_4165447 | - | <i>pes 1</i> | 311 | AGGCCACGGUAGGGAGGUUUGGGA            | 24 | 0 | 0 | 0 | 0  | 0 | 1 |
| siRNA_623772  | - | <i>pes 1</i> | 311 | AGGCCACGGUAGGGAGGUUUGG              | 22 | 0 | 0 | 1 | 0  | 1 | 1 |
| siRNA_210927  | - | <i>pes 1</i> | 311 | AGGCCACGGUAGGGAGGUUUG               | 21 | 0 | 0 | 0 | 0  | 4 | 4 |
| siRNA_3258574 | - | <i>pes 1</i> | 312 | GGCCACGGUAGGGAGGUUUGGGA             | 23 | 0 | 0 | 0 | 1  | 0 | 0 |
| siRNA_1482071 | - | <i>pes 1</i> | 312 | GGCCACGGUAGGGAGGUUUGGGACUCUGGAAUUG, | 38 | 0 | 0 | 0 | 1  | 0 | 0 |
| siRNA_698358  | - | <i>pes 1</i> | 312 | GGCCACGGUAGGGAGGUU                  | 18 | 0 | 0 | 1 | 2  | 0 | 0 |
| siRNA_335459  | - | <i>pes 1</i> | 312 | GGCCACGGUAGGGAGGU                   | 17 | 0 | 0 | 2 | 4  | 0 | 0 |
| siRNA_206620  | - | <i>pes 1</i> | 312 | GGCCACGGUAGGGAGG                    | 16 | 0 | 0 | 1 | 8  | 0 | 0 |
| siRNA_1198764 | - | <i>pes 1</i> | 312 | GGCCACGGUAGGGAGGUUUGGGAC            | 24 | 0 | 0 | 0 | 0  | 1 | 0 |
| siRNA_2938279 | - | <i>pes 1</i> | 312 | GGCCACGGUAGGGAGGUUUGGGACUCUG        | 28 | 0 | 0 | 0 | 0  | 0 | 1 |
| siRNA_1971270 | + | <i>pes 1</i> | 312 | GGCCACGGUAGGGAGGUUUGGGACUC          | 26 | 0 | 0 | 0 | 0  | 0 | 1 |
| siRNA_556922  | - | <i>pes 1</i> | 312 | GGCCACGGUAGGGAGGUUUGG               | 21 | 0 | 0 | 0 | 1  | 1 | 2 |
| siRNA_1688671 | - | <i>pes 1</i> | 313 | GCCACGGUAGGGAGGU                    | 16 | 0 | 0 | 0 | 1  | 0 | 0 |
| siRNA_1594958 | - | <i>pes 1</i> | 313 | GCCACGGUAGGGAGGUUUGGGA              | 22 | 0 | 0 | 0 | 0  | 1 | 0 |
| siRNA_3680616 | - | <i>pes 1</i> | 313 | GCCACGGUAGGGAGGUUUGG                | 20 | 0 | 0 | 0 | 0  | 0 | 1 |
| siRNA_1022536 | - | <i>pes 1</i> | 313 | GCCACGGUAGGGAGGUUUGGG               | 21 | 0 | 0 | 0 | 0  | 1 | 2 |
| siRNA_1870170 | + | <i>pes 1</i> | 314 | CCACGGUAGGGAGGUUUGGGACUC            | 24 | 0 | 0 | 0 | 0  | 1 | 0 |

|               |   |       |     |                           |    |   |   |   |   |   |   |
|---------------|---|-------|-----|---------------------------|----|---|---|---|---|---|---|
| siRNA_1142567 | + | pes 1 | 314 | CCACGGUAGGGAGGUUUGGGA     | 21 | 0 | 0 | 0 | 0 | 0 | 2 |
| siRNA_2995512 | + | pes 1 | 315 | CACGGUAGGGAGGUUUGGGACUC   | 23 | 0 | 0 | 0 | 0 | 0 | 1 |
| siRNA_449706  | + | pes 1 | 315 | CACGGUAGGGAGGUUUGGGACU    | 22 | 0 | 0 | 0 | 0 | 1 | 3 |
| siRNA_1062658 | + | pes 1 | 316 | ACGGUAGGGAGGUUUGGGACUC    | 22 | 0 | 0 | 0 | 0 | 0 | 2 |
| siRNA_482734  | + | pes 1 | 316 | ACGGUAGGGAGGUUUGGGACU     | 21 | 0 | 0 | 0 | 0 | 2 | 2 |
| siRNA_843454  | + | pes 1 | 317 | CGGUAGGGAGGUUUGGGACUC     | 21 | 0 | 0 | 0 | 0 | 2 | 0 |
| siRNA_2437555 | + | pes 1 | 317 | CGGUAGGGAGGUUUGGGACUCU    | 22 | 0 | 0 | 0 | 0 | 0 | 1 |
| siRNA_2919926 | - | pes 1 | 318 | GGUAGGGAGGUUUGGGACUCUGAAU | 26 | 0 | 0 | 0 | 1 | 0 | 0 |
| siRNA_973308  | - | pes 1 | 318 | GGUAGGGAGGUUUGGGACUCUGAA  | 25 | 0 | 0 | 0 | 2 | 0 | 0 |
| siRNA_1071498 | - | pes 1 | 318 | GGUAGGGAGGUUUGGGACUCUGA   | 24 | 0 | 0 | 0 | 0 | 1 | 0 |
| siRNA_3928591 | - | pes 1 | 319 | GUAGGGAGGUUUGGGACUCUGG    | 22 | 0 | 0 | 0 | 0 | 0 | 1 |
| siRNA_2048538 | - | pes 1 | 319 | GUAGGGAGGUUUGGGACUCUG     | 21 | 0 | 0 | 0 | 0 | 0 | 1 |
| siRNA_1483338 | + | pes 1 | 319 | GUAGGGAGGUUUGGGACUC       | 19 | 0 | 0 | 0 | 0 | 0 | 1 |
| siRNA_1337584 | + | pes 1 | 319 | GUAGGGAGGUUUGGGACUCUGG    | 22 | 0 | 0 | 0 | 0 | 1 | 1 |
| siRNA_4150125 | - | pes 1 | 320 | UAGGGAGGUUUGGGACUCUGG     | 21 | 0 | 0 | 0 | 0 | 1 | 0 |
| siRNA_3351115 | + | pes 1 | 320 | UAGGGAGGUUUGGGACUCUGG     | 21 | 0 | 0 | 0 | 0 | 0 | 1 |
| siRNA_589303  | + | pes 1 | 320 | UAGGGAGGUUUGGGACUC        | 18 | 0 | 0 | 0 | 0 | 1 | 2 |
| siRNA_1383172 | - | pes 1 | 321 | AGGGAGGUUUGGGACUCUGGAA    | 22 | 0 | 0 | 0 | 1 | 0 | 1 |
| siRNA_3703620 | + | pes 1 | 321 | AGGGAGGUUUGGGACUCUGGA     | 21 | 0 | 0 | 0 | 0 | 0 | 1 |
| siRNA_1359969 | - | pes 1 | 321 | AGGGAGGUUUGGGACUCUGGA     | 21 | 0 | 0 | 0 | 0 | 0 | 2 |
| siRNA_848425  | - | pes 1 | 322 | GGGAGGUUUGGGACUCUGGAA     | 21 | 0 | 0 | 0 | 1 | 0 | 1 |
| siRNA_2079877 | - | pes 1 | 322 | GGGAGGUUUGGGACUCUGAAU     | 22 | 0 | 0 | 0 | 1 | 0 | 1 |
| siRNA_3681559 | + | pes 1 | 323 | GGAGGUUUGGGACUCUGGA       | 19 | 0 | 0 | 0 | 1 | 0 | 0 |
| siRNA_1359058 | - | pes 1 | 323 | GGAGGUUUGGGACUCUGGAAUUGA  | 24 | 0 | 0 | 0 | 0 | 0 | 2 |
| siRNA_533227  | - | pes 1 | 323 | GGAGGUUUGGGACUCUGGAAUU    | 22 | 0 | 0 | 0 | 0 | 0 | 3 |
| siRNA_310536  | - | pes 1 | 323 | GGAGGUUUGGGACUCUGGAAU     | 21 | 0 | 0 | 0 | 1 | 3 | 4 |
| siRNA_781464  | - | pes 1 | 324 | GAGGUUUGGGACUCUGGAAUUGAC  | 24 | 0 | 0 | 0 | 1 | 0 | 2 |
| siRNA_948002  | - | pes 1 | 324 | GAGGUUUGGGACUCUGGAAUU     | 21 | 0 | 0 | 0 | 0 | 0 | 2 |
| siRNA_663165  | - | pes 1 | 324 | GAGGUUUGGGACUCUGGAAUUG    | 22 | 0 | 0 | 0 | 1 | 0 | 2 |
| siRNA_3425726 | - | pes 1 | 325 | AGGUUUGGGACUCUGGA         | 17 | 0 | 0 | 1 | 0 | 0 | 0 |
| siRNA_3685506 | - | pes 1 | 325 | AGGUUUGGGACUCUGGAA        | 18 | 0 | 0 | 1 | 0 | 0 | 0 |
| siRNA_3450069 | - | pes 1 | 325 | AGGUUUGGGACUCUGGAAU       | 19 | 0 | 0 | 0 | 1 | 0 | 0 |
| siRNA_1383120 | - | pes 1 | 325 | AGGUUUGGGACUCUGGAAUUG     | 21 | 0 | 0 | 0 | 0 | 0 | 1 |
| siRNA_319475  | - | pes 1 | 325 | AGGUUUGGGACUCUGGAAUUGA    | 22 | 0 | 0 | 0 | 0 | 1 | 4 |
| siRNA_310471  | - | pes 1 | 325 | AGGUUUGGGACUCUGGAAUUGACA  | 24 | 0 | 0 | 0 | 0 | 1 | 6 |
| siRNA_1855782 | + | pes 1 | 326 | GGUUUGGGACUCUGGA          | 16 | 0 | 0 | 0 | 1 | 0 | 0 |
| siRNA_1704203 | - | pes 1 | 326 | GGUUUGGGACUCUGGAAU        | 18 | 0 | 0 | 0 | 1 | 0 | 0 |
| siRNA_1023669 | - | pes 1 | 326 | GGUUUGGGACUCUGGA          | 16 | 0 | 0 | 0 | 2 | 0 | 0 |
| siRNA_1672557 | - | pes 1 | 326 | GGUUUGGGACUCUGGAAUUGACA   | 23 | 0 | 0 | 0 | 0 | 0 | 1 |
| siRNA_1599585 | - | pes 1 | 326 | GGUUUGGGACUCUGGAAUUGAC    | 22 | 0 | 0 | 0 | 0 | 0 | 1 |
| siRNA_426033  | - | pes 1 | 326 | GGUUUGGGACUCUGGAAUUGACAU  | 24 | 0 | 0 | 0 | 0 | 0 | 4 |

|               |   |       |     |                                   |    |   |   |   |   |   |    |
|---------------|---|-------|-----|-----------------------------------|----|---|---|---|---|---|----|
| siRNA_234557  | - | pes 1 | 326 | GGUUUGGGACUCUGGAAUUGA             | 21 | 0 | 0 | 0 | 0 | 4 | 5  |
| siRNA_3487413 | - | pes 1 | 327 | GUUUGGGACUCUGGAAUUGACAU           | 23 | 0 | 0 | 0 | 1 | 0 | 0  |
| siRNA_2231410 | - | pes 1 | 327 | GUUUGGGACUCUGGAAU                 | 17 | 0 | 0 | 0 | 1 | 0 | 0  |
| siRNA_3829742 | - | pes 1 | 327 | GUUUGGGACUCUGGAAUUGACAUUUCGCG     | 29 | 0 | 0 | 0 | 0 | 0 | 1  |
| siRNA_617621  | - | pes 1 | 327 | GUUUGGGACUCUGGAAUUGACA            | 22 | 0 | 0 | 0 | 0 | 1 | 3  |
| siRNA_323176  | - | pes 1 | 327 | GUUUGGGACUCUGGAAUUGACAUU          | 24 | 0 | 0 | 0 | 0 | 1 | 4  |
| siRNA_3508281 | - | pes 1 | 329 | UUGGGACUCUGGAAUUGACAUUUCGCGUA     | 29 | 0 | 0 | 0 | 0 | 1 | 0  |
| siRNA_4263246 | - | pes 1 | 331 | GGGACUCUGGAAUUGAC                 | 17 | 0 | 0 | 0 | 1 | 0 | 0  |
| siRNA_1595242 | - | pes 1 | 331 | GGGACUCUGGAAUUGACAU               | 19 | 0 | 0 | 0 | 1 | 0 | 0  |
| siRNA_1647057 | - | pes 1 | 331 | GGGACUCUGGAAUUGACAUU              | 20 | 0 | 0 | 0 | 1 | 0 | 0  |
| siRNA_650882  | - | pes 1 | 331 | GGGACUCUGGAAUUGACA                | 18 | 0 | 0 | 1 | 3 | 0 | 0  |
| siRNA_610751  | - | pes 1 | 331 | GGGACUCUGGAAUUGACAUUUC            | 22 | 0 | 0 | 0 | 0 | 2 | 1  |
| siRNA_897205  | - | pes 1 | 331 | GGGACUCUGGAAUUGACAUUUCGCG         | 24 | 0 | 0 | 0 | 0 | 0 | 2  |
| siRNA_246023  | - | pes 1 | 331 | GGGACUCUGGAAUUGACAUU              | 21 | 0 | 0 | 0 | 0 | 3 | 4  |
| siRNA_1960848 | - | pes 1 | 332 | GGACUCUGGAAUUGACAUU               | 19 | 0 | 0 | 0 | 1 | 0 | 0  |
| siRNA_1503960 | - | pes 1 | 332 | GGACUCUGGAAUUGACAUUUCGCG          | 24 | 0 | 0 | 0 | 0 | 0 | 1  |
| siRNA_804721  | - | pes 1 | 332 | GGACUCUGGAAUUGACAUUUC             | 21 | 0 | 0 | 0 | 0 | 1 | 2  |
| siRNA_549794  | - | pes 1 | 332 | GGACUCUGGAAUUGACAUUUCG            | 22 | 0 | 0 | 0 | 0 | 2 | 2  |
| siRNA_3085715 | - | pes 1 | 333 | GACUCUGGAAUUGACAUUUCGCG           | 23 | 0 | 0 | 0 | 1 | 0 | 0  |
| siRNA_761158  | - | pes 1 | 333 | GACUCUGGAAUUGACAUUUCG             | 21 | 0 | 0 | 0 | 0 | 2 | 1  |
| siRNA_1205088 | - | pes 1 | 333 | GACUCUGGAAUUGACAUUUCGCGU          | 24 | 0 | 0 | 0 | 1 | 0 | 1  |
| siRNA_1276905 | - | pes 1 | 333 | GACUCUGGAAUUGACAUUUCGCG           | 22 | 0 | 0 | 0 | 0 | 0 | 1  |
| siRNA_1159749 | - | pes 1 | 334 | ACUCUGGAAUUGACAUUUCG              | 20 | 0 | 0 | 0 | 0 | 1 | 0  |
| siRNA_3186671 | - | pes 1 | 334 | ACUCUGGAAUUGACAUUUCGCGU           | 23 | 0 | 0 | 0 | 0 | 0 | 1  |
| siRNA_776319  | - | pes 1 | 334 | ACUCUGGAAUUGACAUUUCGCG            | 21 | 0 | 0 | 0 | 0 | 1 | 1  |
| siRNA_859058  | - | pes 1 | 334 | ACUCUGGAAUUGACAUUUCGCG            | 22 | 0 | 0 | 0 | 0 | 0 | 2  |
| siRNA_143562  | - | pes 1 | 334 | ACUCUGGAAUUGACAUUUCGCGUA          | 24 | 0 | 0 | 0 | 0 | 4 | 10 |
| siRNA_4126476 | - | pes 1 | 335 | CUCUGGAAUUGACAUU                  | 17 | 0 | 0 | 1 | 0 | 0 | 0  |
| siRNA_3144233 | - | pes 1 | 335 | CUCUGGAAUUGACAUU                  | 16 | 0 | 0 | 0 | 1 | 0 | 0  |
| siRNA_1168208 | - | pes 1 | 335 | CUCUGGAAUUGACAUUUCGCGU            | 22 | 0 | 0 | 0 | 0 | 1 | 1  |
| siRNA_2088145 | - | pes 1 | 335 | CUCUGGAAUUGACAUUUCGCGUAC          | 24 | 0 | 0 | 0 | 0 | 0 | 1  |
| siRNA_191130  | - | pes 1 | 335 | CUCUGGAAUUGACAUUUCGCG             | 21 | 0 | 0 | 0 | 0 | 6 | 4  |
| siRNA_2947115 | - | pes 1 | 336 | UCUGGAAUUGACAUUUCGCGUACUG         | 25 | 0 | 0 | 0 | 1 | 0 | 0  |
| siRNA_1100036 | - | pes 1 | 338 | UGGAAUUGACAUUUCGCGUAC             | 21 | 0 | 0 | 1 | 0 | 0 | 1  |
| siRNA_3565846 | + | pes 1 | 339 | GGAAUUGACAUUUCGCGUACUGU           | 23 | 0 | 0 | 0 | 0 | 0 | 1  |
| siRNA_1094347 | + | pes 1 | 339 | GGAAUUGACAUUUCGCGUACUGUU          | 24 | 0 | 0 | 0 | 0 | 0 | 2  |
| siRNA_429083  | - | pes 1 | 339 | GGAAUUGACAUUUCGCGUACUG            | 22 | 0 | 0 | 1 | 0 | 1 | 2  |
| siRNA_3355920 | - | pes 1 | 340 | GAAUUGACAUUUCGCGUACUGUUGGGUGUUUAC | 36 | 0 | 0 | 0 | 1 | 0 | 0  |
| siRNA_828443  | + | pes 1 | 341 | AAUUGACAUUUCGCGUACUGUU            | 22 | 0 | 0 | 0 | 0 | 2 | 1  |
| siRNA_1147743 | + | pes 1 | 341 | AAUUGACAUUUCGCGUACUGU             | 21 | 0 | 0 | 0 | 0 | 0 | 2  |
| siRNA_517306  | + | pes 1 | 341 | AAUUGACAUUUCGCGUACUGUUGG          | 24 | 0 | 0 | 0 | 0 | 1 | 2  |

|               |   |       |     |                            |    |   |   |   |   |   |   |
|---------------|---|-------|-----|----------------------------|----|---|---|---|---|---|---|
| siRNA_3322998 | + | pes 1 | 342 | AUUGACAUUUCGCGUACUGUUGGG   | 24 | 0 | 0 | 0 | 0 | 0 | 1 |
| siRNA_650143  | + | pes 1 | 342 | AUUGACAUUUCGCGUACUGUU      | 21 | 0 | 0 | 0 | 0 | 0 | 1 |
| siRNA_788773  | + | pes 1 | 343 | UUGACAUUUCGCGUACUGUUGG     | 22 | 0 | 0 | 0 | 0 | 0 | 2 |
| siRNA_3227454 | + | pes 1 | 344 | UGACAUUUCGCGUACUGUUGGGUG   | 24 | 0 | 0 | 0 | 0 | 0 | 1 |
| siRNA_450838  | + | pes 1 | 344 | UGACAUUUCGCGUACUGUUGGG     | 22 | 0 | 0 | 0 | 0 | 2 | 3 |
| siRNA_3265917 | - | pes 1 | 345 | GACAUUUCGCGUACUGU          | 17 | 0 | 0 | 0 | 1 | 0 | 0 |
| siRNA_3695643 | + | pes 1 | 345 | GACAUUUCGCGUACU            | 15 | 0 | 0 | 0 | 1 | 0 | 0 |
| siRNA_3698604 | - | pes 1 | 345 | GACAUUUCGCGUACUGUUGGGUGGUU | 26 | 0 | 0 | 0 | 1 | 0 | 0 |
| siRNA_3144638 | - | pes 1 | 345 | GACAUUUCGCGUACUGUUGGGUG    | 23 | 0 | 0 | 0 | 0 | 1 | 0 |
| siRNA_1316745 | + | pes 1 | 345 | GACAUUUCGCGUACUGUUGGGUGG   | 24 | 0 | 0 | 0 | 0 | 1 | 0 |
| siRNA_628818  | - | pes 1 | 345 | GACAUUUCGCGUACUGUUGGG      | 21 | 0 | 0 | 1 | 1 | 1 | 1 |
| siRNA_4081234 | - | pes 1 | 345 | GACAUUUCGCGUACUGUUGG       | 20 | 0 | 0 | 0 | 0 | 0 | 1 |
| siRNA_462853  | - | pes 1 | 345 | GACAUUUCGCGUACUGUUGGGU     | 22 | 0 | 0 | 0 | 0 | 2 | 2 |
| siRNA_1092601 | + | pes 1 | 345 | GACAUUUCGCGUACUGUUGGGU     | 22 | 0 | 0 | 0 | 0 | 0 | 2 |
| siRNA_610697  | + | pes 1 | 345 | GACAUUUCGCGUACUGUUGGG      | 21 | 0 | 0 | 0 | 0 | 1 | 2 |
| siRNA_341483  | - | pes 1 | 345 | GACAUUUCGCGUACUGUUGGGUGG   | 24 | 0 | 0 | 0 | 0 | 2 | 3 |
| siRNA_3957546 | - | pes 1 | 346 | ACAUUUCGCGUACUGUUGGG       | 20 | 0 | 0 | 0 | 1 | 0 | 0 |
| siRNA_1507533 | + | pes 1 | 346 | ACAUUUCGCGUACUGUUGGGUG     | 22 | 0 | 0 | 0 | 0 | 1 | 0 |
| siRNA_956444  | - | pes 1 | 346 | ACAUUUCGCGUACUGUUGGGUGGU   | 24 | 0 | 0 | 0 | 0 | 1 | 1 |
| siRNA_934601  | + | pes 1 | 346 | ACAUUUCGCGUACUGUUGGGUGGU   | 24 | 0 | 0 | 0 | 0 | 1 | 1 |
| siRNA_404185  | - | pes 1 | 346 | ACAUUUCGCGUACUGUUGGGU      | 21 | 0 | 0 | 0 | 0 | 2 | 2 |
| siRNA_518782  | + | pes 1 | 346 | ACAUUUCGCGUACUGUUGGGU      | 21 | 0 | 0 | 0 | 0 | 1 | 3 |
| siRNA_333802  | - | pes 1 | 346 | ACAUUUCGCGUACUGUUGGGUG     | 22 | 0 | 0 | 0 | 0 | 2 | 4 |
| siRNA_4049206 | - | pes 1 | 347 | CAUUUCGCGUACUGUUGGGUG      | 21 | 0 | 0 | 0 | 0 | 0 | 1 |
| siRNA_3722758 | - | pes 1 | 347 | CAUUUCGCGUACUGUUGGGUGGUU   | 24 | 0 | 0 | 0 | 0 | 0 | 1 |
| siRNA_1093344 | + | pes 1 | 347 | CAUUUCGCGUACUGUUGGGUGG     | 22 | 0 | 0 | 0 | 0 | 1 | 1 |
| siRNA_1000883 | + | pes 1 | 347 | CAUUUCGCGUACUGUUGGGUGGUU   | 24 | 0 | 0 | 0 | 0 | 1 | 1 |
| siRNA_1276871 | + | pes 1 | 347 | CAUUUCGCGUACUGUUGGGUG      | 21 | 0 | 0 | 0 | 0 | 0 | 1 |
| siRNA_1347067 | + | pes 1 | 348 | AUUUCGCGUACUGUUGGGUGGU     | 22 | 0 | 0 | 0 | 0 | 1 | 1 |
| siRNA_3898379 | + | pes 1 | 348 | AUUUCGCGUACUGUUGGGUGG      | 21 | 0 | 0 | 0 | 0 | 0 | 1 |
| siRNA_2009029 | + | pes 1 | 348 | AUUUCGCGUACUGUUGGGUGGUUU   | 24 | 0 | 0 | 0 | 0 | 0 | 1 |
| siRNA_3283877 | + | pes 1 | 349 | UUUCGCGUACUGUUGGGUGGUUU    | 23 | 0 | 0 | 1 | 0 | 0 | 0 |
| siRNA_3972033 | + | pes 1 | 349 | UUUCGCGUACUGUUGGGUGGUUUA   | 24 | 0 | 0 | 0 | 0 | 0 | 1 |
| siRNA_455091  | + | pes 1 | 349 | UUUCGCGUACUGUUGGGUGGU      | 21 | 0 | 0 | 0 | 1 | 1 | 3 |
| siRNA_328157  | + | pes 1 | 349 | UUUCGCGUACUGUUGGGUGGUU     | 22 | 0 | 0 | 0 | 0 | 0 | 6 |
| siRNA_3775663 | + | pes 1 | 350 | UUCGCGUACUGUUGGGUGGUUU     | 22 | 0 | 0 | 0 | 0 | 0 | 1 |
| siRNA_1277909 | + | pes 1 | 350 | UUCGCGUACUGUUGGGUGGUU      | 21 | 0 | 0 | 0 | 0 | 1 | 1 |
| siRNA_726782  | + | pes 1 | 350 | UUCGCGUACUGUUGGGUGGUUUAC   | 24 | 0 | 0 | 0 | 0 | 0 | 2 |
| siRNA_2065179 | + | pes 1 | 351 | UCGCGUACUGUUGGGUGGUUUA     | 22 | 0 | 0 | 0 | 0 | 0 | 1 |
| siRNA_626975  | + | pes 1 | 351 | UCGCGUACUGUUGGGUGGUUUU     | 21 | 0 | 0 | 0 | 0 | 0 | 3 |
| siRNA_278414  | + | pes 1 | 351 | UCGCGUACUGUUGGGUGGUUUACC   | 24 | 0 | 0 | 0 | 0 | 3 | 4 |

|               |   |       |     |                          |    |   |   |   |   |   |   |
|---------------|---|-------|-----|--------------------------|----|---|---|---|---|---|---|
| siRNA_3601080 | - | pes 1 | 352 | CGCGUACUGUUGGGUGGUU      | 19 | 0 | 0 | 1 | 0 | 0 | 0 |
| siRNA_1725283 | - | pes 1 | 352 | CGCGUACUGUUGGGUGG        | 17 | 0 | 0 | 0 | 2 | 0 | 0 |
| siRNA_1424421 | - | pes 1 | 352 | CGCGUACUGUUGGGUGGUUA     | 21 | 0 | 0 | 0 | 0 | 0 | 1 |
| siRNA_2418510 | + | pes 1 | 352 | CGCGUACUGUUGGGUGGUUAC    | 22 | 0 | 0 | 0 | 0 | 0 | 1 |
| siRNA_1957562 | - | pes 1 | 353 | GCGUACUGUUGGGUGG         | 16 | 0 | 0 | 0 | 1 | 0 | 0 |
| siRNA_1060315 | - | pes 1 | 353 | GCGUACUGUUGGGUGGUUAC     | 21 | 0 | 0 | 0 | 0 | 1 | 1 |
| siRNA_525027  | + | pes 1 | 353 | GCGUACUGUUGGGUGUUACC     | 22 | 0 | 0 | 0 | 0 | 1 | 2 |
| siRNA_1919799 | + | pes 1 | 354 | CGUACUGUUGGGUGGUUACCAU   | 24 | 0 | 0 | 0 | 0 | 1 | 0 |
| siRNA_414981  | + | pes 1 | 354 | CGUACUGUUGGGUGGUUACC     | 21 | 0 | 0 | 0 | 0 | 3 | 2 |
| siRNA_3656327 | + | pes 1 | 355 | GUACUGUUGGGUGGUUACCAU    | 23 | 0 | 0 | 0 | 0 | 0 | 1 |
| siRNA_2652062 | - | pes 1 | 356 | UACUGUUGGGUGGUUACCAUUCUG | 25 | 0 | 0 | 1 | 0 | 0 | 0 |
| siRNA_1123081 | + | pes 1 | 356 | UACUGUUGGGUGGUUACCAU     | 21 | 0 | 0 | 0 | 0 | 1 | 1 |
| siRNA_895026  | + | pes 1 | 356 | UACUGUUGGGUGGUUACCAU     | 22 | 0 | 0 | 0 | 0 | 0 | 2 |
| siRNA_4254317 | - | pes 1 | 357 | ACUGUUGGGUGGUUACCAUUCU   | 23 | 0 | 0 | 0 | 0 | 0 | 1 |
| siRNA_1455909 | - | pes 1 | 358 | CUGUUGGGUGGUUACCAUUCUGC  | 24 | 0 | 0 | 0 | 0 | 1 | 0 |
| siRNA_2990783 | + | pes 1 | 358 | CUGUUGGGUGGUUACCAUUCUGC  | 24 | 0 | 0 | 0 | 0 | 0 | 1 |
| siRNA_2268512 | - | pes 1 | 360 | GUUGGGUGGUUACCAUUCUGC    | 22 | 0 | 0 | 0 | 0 | 1 | 0 |
| siRNA_1222102 | - | pes 1 | 364 | GGUGGUUACCAUUCUGCACCCAA  | 24 | 0 | 0 | 0 | 0 | 0 | 1 |
| siRNA_3861085 | - | pes 1 | 365 | GUGGUUUACCAUUCUGCACCCA   | 22 | 0 | 0 | 0 | 0 | 0 | 1 |
| siRNA_716549  | + | pes 1 | 365 | GUGGUUUACCAUUCUGCACCC    | 21 | 0 | 0 | 0 | 0 | 1 | 1 |
| siRNA_2681169 | + | pes 1 | 366 | UGGUUUACCAUUCUGCACCCAAU  | 23 | 0 | 0 | 0 | 0 | 0 | 1 |
| siRNA_3172012 | + | pes 1 | 366 | UGGUUUACCAUUCUGCACCCAA   | 22 | 0 | 0 | 0 | 0 | 0 | 1 |
| siRNA_1664366 | + | pes 1 | 366 | UGGUUUACCAUUCUGCACCC     | 20 | 0 | 0 | 0 | 0 | 0 | 1 |
| siRNA_1990944 | + | pes 1 | 366 | UGGUUUACCAUUCUGCACCCA    | 21 | 0 | 0 | 0 | 0 | 0 | 1 |
| siRNA_2057444 | - | pes 1 | 367 | GGUUUACCAUUCUGCACCCA     | 20 | 0 | 0 | 0 | 0 | 1 | 0 |
| siRNA_2562358 | - | pes 1 | 367 | GGUUUACCAUUCUGCACCCA     | 22 | 0 | 0 | 0 | 0 | 0 | 1 |
| siRNA_189712  | - | pes 1 | 367 | GGUUUACCAUUCUGCACCCA     | 21 | 0 | 0 | 1 | 0 | 2 | 7 |
| siRNA_3964390 | + | pes 1 | 368 | GUUUACCAUUCUGCACCCAUA    | 22 | 0 | 0 | 0 | 0 | 0 | 1 |
| siRNA_3867923 | - | pes 1 | 368 | GUUUACCAUUCUGCACCCAUAAC  | 24 | 0 | 0 | 0 | 0 | 0 | 1 |
| siRNA_1898671 | + | pes 1 | 369 | UUUACCAUUCUGCACCCAUA     | 21 | 0 | 0 | 0 | 0 | 1 | 0 |
| siRNA_597137  | + | pes 1 | 369 | UUUACCAUUCUGCACCCAUAACC  | 24 | 0 | 0 | 0 | 0 | 1 | 2 |
| siRNA_1067592 | + | pes 1 | 370 | UUACCAUUCUGCACCCAUAAC    | 22 | 0 | 0 | 0 | 0 | 1 | 1 |
| siRNA_1535888 | - | pes 1 | 371 | UACCAUUCUGCACCCA         | 17 | 0 | 0 | 1 | 0 | 0 | 0 |
| siRNA_943267  | - | pes 1 | 371 | UACCAUUCUGCACCCA         | 16 | 0 | 0 | 0 | 2 | 0 | 0 |
| siRNA_2287756 | + | pes 1 | 371 | UACCAUUCUGCACCCAUAAC     | 21 | 0 | 0 | 0 | 0 | 1 | 0 |
| siRNA_1768855 | - | pes 1 | 371 | UACCAUUCUGCACCCAUAACC    | 22 | 0 | 0 | 0 | 0 | 0 | 1 |
| siRNA_691118  | + | pes 1 | 371 | UACCAUUCUGCACCCAUAACC    | 22 | 0 | 0 | 0 | 0 | 1 | 1 |
| siRNA_3065370 | - | pes 1 | 372 | ACCAUUCUGCACCCA          | 16 | 0 | 0 | 0 | 1 | 0 | 0 |
| siRNA_1313919 | + | pes 1 | 372 | ACCAUUCUGCACCCAUAACC     | 21 | 0 | 0 | 0 | 0 | 1 | 0 |
| siRNA_1451877 | + | pes 1 | 373 | CCAUUCUGCACCCAUAACC      | 20 | 0 | 0 | 0 | 1 | 0 | 0 |

All data have been deposited in FigShare: doi: [10.6084/m9.figshare.11771628](https://doi.org/10.6084/m9.figshare.11771628). The mapping coordinates are available in the different "comp\_6492\_" files.
